# Supplementary material for: Peer Presence Effect on Numerosity and Phonological Comparisons in 4th Graders: When Working with a SchoolMate Makes Children More Adult-like
Source: MDPI journal article supplement (doi:10.3390/biology10090902), 2021-09-12

**Table S1: Individual estimated Ex-Gaussian parameters.** Ex-Gaussian decomposition of RTs into three parameters ( $\mu$ ,  $\sigma$ ,  $\tau$ ) for each subject (Children or Adults) and each trial type (Numerosity or Phonological comparison).

|         | Numerosity Comparison      |          |        | Phonological Comparison |          |        |
|---------|----------------------------|----------|--------|-------------------------|----------|--------|
|         | $\mu$                      | $\sigma$ | $\tau$ | $\mu$                   | $\sigma$ | $\tau$ |
| Subject | Children – Alone Condition |          |        |                         |          |        |
| tt1     | 1.03                       | 0.21     | 0.27   | 1.41                    | 0.22     | 0.22   |
| tt10    | 1.1                        | 0.15     | 0.2    | 1.49                    | 0.26     | 0.2    |
| tt10RA  | 1.44                       | 0.29     | 0.14   | 1.57                    | 0.33     | 0.17   |
| tt11    | 1.27                       | 0.31     | 0.16   | 1.13                    | 0.41     | 0.25   |
| tt12    | 1.05                       | 0.26     | 0.2    | 1.44                    | 0.22     | 0.17   |
| tt14    | 1.19                       | 0.15     | 0.2    | 1.7                     | 0.3      | 0.09   |
| tt15TL  | 1.14                       | 0.36     | 0.22   | 1.47                    | 0.29     | 0.14   |
| tt16TC  | 1.15                       | 0.25     | 0.21   | 1.64                    | 0.33     | 0.12   |
| tt18    | 1.11                       | 0.38     | 0.17   | 1.51                    | 0.38     | 0.13   |
| tt19GR  | 1.05                       | 0.16     | 0.21   | 1.37                    | 0.24     | 0.13   |
| tt18A   | 1.04                       | 0.37     | 0.22   | 1.02                    | 0.25     | 0.25   |
| tt20GA  | 0.86                       | 0.27     | 0.15   | 1.51                    | 0.28     | 0.16   |
| tt21    | 1.16                       | 0.24     | 0.17   | 1.33                    | 0.25     | 0.23   |
| tt22    | 0.63                       | 0.2      | 0.26   | 1.1                     | 0.2      | 0.14   |
| tt2CM   | 0.66                       | 0.18     | 0.12   | 0.79                    | 0.15     | 0.25   |
| tt30SM  | 0.95                       | 0.4      | 0.21   | 1.49                    | 0.36     | 0.15   |
| tt31SL  | 0.87                       | 0.17     | 0.2    | 1.01                    | 0.17     | 0.26   |
| tt32MJ  | 1.26                       | 0.22     | 0.29   | 1.55                    | 0.32     | 0.14   |
| tt33GA  | 0.52                       | 0.21     | 0.35   | 1.06                    | 0.52     | 0.26   |
| tt34KJ  | 1.12                       | 0.21     | 0.15   | 1.39                    | 0.31     | 0.23   |
| tt35JP  | 1.36                       | 0.24     | 0.15   | 1.42                    | 0.27     | 0.17   |
| tt36GL  | 1.12                       | 0.27     | 0.17   | 1.12                    | 0.22     | 0.22   |
| tt37FR  | 0.92                       | 0.31     | 0.21   | 1.1                     | 0.33     | 0.26   |
| tt38CL  | 1.33                       | 0.29     | 0.16   | 1.17                    | 0.3      | 0.4    |
| tt39BA  | 1.05                       | 0.3      | 0.25   | 1.24                    | 0.31     | 0.21   |
| tt3NL   | 0.73                       | 0.09     | 0.09   | 0.92                    | 0.15     | 0.25   |

|                                    |      |      |      |      |      |      |
|------------------------------------|------|------|------|------|------|------|
| tt40DO                             | 0.68 | 0.25 | 0.21 | 1.1  | 0.3  | 0.39 |
| tt41DA                             | 0.5  | 0.16 | 0.32 | 0.79 | 0.21 | 0.31 |
| tt42DL                             | 0.97 | 0.33 | 0.22 | 1.49 | 0.36 | 0.14 |
| tt4FD                              | 0.56 | 0.15 | 0.2  | 1.01 | 0.29 | 0.23 |
| tt6                                | 0.58 | 0.15 | 0.25 | 1.11 | 0.34 | 0.3  |
| tt61NA                             | 1.41 | 0.18 | 0.24 | 1.39 | 0.21 | 0.28 |
| tt66MD                             | 0.74 | 0.18 | 0.26 | 1.07 | 0.2  | 0.26 |
| tt67DM                             | 0.34 | 0.12 | 0.22 | 0.51 | 0.17 | 0.34 |
| tt68BE                             | 1.21 | 0.23 | 0.31 | 1.48 | 0.22 | 0.29 |
| tt69AE                             | 0.87 | 0.23 | 0.3  | 1.5  | 0.34 | 0.17 |
| tt6GG                              | 1.23 | 0.14 | 0.22 | 1.49 | 0.24 | 0.17 |
| tt7                                | 0.56 | 0.16 | 0.16 | 0.63 | 0.05 | 0.39 |
| tt74BE                             | 0.59 | 0.2  | 0.19 | 0.82 | 0.21 | 0.18 |
| tt75DN                             | 0.78 | 0.33 | 0.26 | 1.13 | 0.33 | 0.27 |
| tt76AE                             | -    | -    | -    | 0.9  | 0.24 | 0.25 |
| tt77BM                             | 1.12 | 0.18 | 0.25 | 1.52 | 0.21 | 0.19 |
| tt8                                | 1.26 | 0.23 | 0.13 | 1.3  | 0.21 | 0.23 |
| tt80VJ                             | 0.88 | 0.26 | 0.21 | 1.26 | 0.25 | 0.15 |
| tt81PG                             | 0.93 | 0.2  | 0.27 | 1.26 | 0.21 | 0.28 |
| tt82VN                             | 0.99 | 0.25 | 0.24 | 1.27 | 0.23 | 0.31 |
| tt85PF                             | 1.18 | 0.35 | 0.13 | 1.17 | 0.33 | 0.2  |
| tt9                                | 0.8  | 0.19 | 0.31 | 1.15 | 0.31 | 0.14 |
| tt9MA                              | 1.18 | 0.27 | 0.2  | 1.53 | 0.25 | 0.2  |
| <b>Children – Social Condition</b> |      |      |      |      |      |      |
| tt11BI                             | 1.06 | 0.28 | 0.23 | 1.28 | 0.26 | 0.24 |
| tt12KC                             | 1.3  | 0.2  | 0.27 | 1.31 | 0.28 | 0.22 |
| tt13                               | 0.85 | 0.24 | 0.33 | 1.79 | 0.15 | 0.2  |
| tt13FJ                             | 0.6  | 0.19 | 0.33 | 0.65 | 0.18 | 0.25 |
| tt14FC                             | 1.07 | 0.31 | 0.22 | 1.35 | 0.37 | 0.16 |
| tt15                               | 1.1  | 0.19 | 0.25 | 1.5  | 0.37 | 0.17 |
| tt16                               | 0.71 | 0.3  | 0.28 | 1.05 | 0.35 | 0.28 |

|        |      |      |      |      |      |      |
|--------|------|------|------|------|------|------|
| tt17   | 0.6  | 0.1  | 0.08 | 0.74 | 0.09 | 0.1  |
| tt19   | 1.04 | 0.34 | 0.11 | 1.13 | 0.3  | 0.3  |
| tt20   | 0.68 | 0.17 | 0.24 | 1.18 | 0.32 | 0.29 |
| tt21UH | 1.44 | 0.16 | 0.21 | 1.32 | 0.25 | 0.19 |
| tt22HC | 1.05 | 0.22 | 0.23 | 1.34 | 0.3  | 0.22 |
| tt23   | 0.33 | 0.07 | 0.15 | 0.57 | 0.14 | 0.07 |
| tt23MZ | 0.86 | 0.19 | 0.24 | 1.21 | 0.33 | 0.3  |
| tt24   | 0.58 | 0.18 | 0.3  | 1.42 | 0.42 | 0.13 |
| tt24TS | 0.64 | 0.1  | 0.28 | 0.96 | 0.18 | 0.29 |
| tt25   | 0.52 | 0.17 | 0.29 | 0.93 | 0.17 | 0.18 |
| tt26   | 1.3  | 0.29 | 0.14 | 1.55 | 0.23 | 0.05 |
| tt26MH | 0.51 | 0.19 | 0.2  | 1.1  | 0.33 | 0.23 |
| tt28NM | 0.29 | 0.03 | 0.2  | 0.74 | 0.2  | 0.16 |
| tt3    | 0.2  | 0.16 | 0.35 | 0.8  | 0.2  | 0.17 |
| tt4    | 0.31 | 0.15 | 0.34 | 0.58 | 0.08 | 0.11 |
| tt43BC | 0.48 | 0.03 | 0.32 | 0.93 | 0.2  | 0.25 |
| tt45LA | 0.51 | 0.22 | 0.37 | 1.26 | 0.33 | 0.19 |
| tt46SE | 0.43 | 0.18 | 0.3  | 0.64 | 0.12 | 0.16 |
| tt48LM | 0.5  | 0.09 | 0.22 | 0.79 | 0.14 | 0.33 |
| tt49DM | 1.07 | 0.17 | 0.23 | 1.14 | 0.24 | 0.23 |
| tt5    | 1.17 | 0.24 | 0.31 | 1.66 | 0.16 | 0.22 |
| tt50SA | 0.95 | 0.21 | 0.19 | 1.32 | 0.17 | 0.22 |
| tt53ED | 0.76 | 0.16 | 0.21 | 0.75 | 0.18 | 0.21 |
| tt54RA | 0.79 | 0.34 | 0.18 | 1.02 | 0.3  | 0.12 |
| tt55DC | 1.17 | 0.17 | 0.22 | 1.19 | 0.24 | 0.21 |
| tt56HM | 0.71 | 0.22 | 0.31 | 0.88 | 0.22 | 0.26 |
| tt57HA | 1.03 | 0.25 | 0.23 | 1.57 | 0.22 | 0.29 |
| tt58JR | 0.6  | 0.16 | 0.35 | 0.97 | 0.32 | 0.31 |
| tt59DN | 0.54 | 0.21 | 0.18 | 0.69 | 0.23 | 0.31 |
| tt60RG | 0.28 | 0.17 | 0.34 | 0.61 | 0.28 | 0.38 |
| tt62LL | 0.8  | 0.23 | 0.24 | 1.16 | 0.35 | 0.19 |
| tt63DT | 0.51 | 0.14 | 0.15 | 1.26 | 0.31 | 0.29 |

|                                 |      |      |      |      |      |      |
|---------------------------------|------|------|------|------|------|------|
| tt64GS                          | 0.51 | 0.16 | 0.31 | 1.17 | 0.45 | 0.18 |
| tt65JC                          | 0.56 | 0.14 | 0.19 | 1.03 | 0.29 | 0.09 |
| tt70BE                          | 0.76 | 0.18 | 0.24 | 1.15 | 0.25 | 0.24 |
| tt71MO                          | 0.52 | 0.11 | 0.22 | 1    | 0.15 | 0.14 |
| tt72BH                          | 0.89 | 0.23 | 0.22 | 1.43 | 0.25 | 0.33 |
| tt73CM                          | 0.41 | 0.13 | 0.26 | 0.77 | 0.12 | 0.12 |
| tt78IA                          | 1.06 | 0.32 | 0.26 | 1.59 | 0.36 | 0.14 |
| tt79DA                          | 0.78 | 0.31 | 0.31 | 1.35 | 0.4  | 0.14 |
| tt83PD                          | 0.97 | 0.21 | 0.18 | 1.64 | 0.17 | 0.23 |
| tt84SA                          | 0.44 | 0.17 | 0.18 | 0.68 | 0.17 | 0.13 |
| tt8BB                           | 1.17 | 0.34 | 0.14 | 1.12 | 0.28 | 0.21 |
| <b>Adults – Alone Condition</b> |      |      |      |      |      |      |
| tts10                           | 0.99 | 0.06 | 0.08 | 1.07 | 0.04 | 0.14 |
| tts101                          | 0.3  | 0.05 | 0.22 | 0.49 | 0.08 | 0.26 |
| tts102                          | 0.41 | 0.16 | 0.29 | 0.68 | 0.24 | 0.26 |
| tts103                          | 0.4  | 0.1  | 0.24 | 0.54 | 0.1  | 0.12 |
| tts106                          | 1.2  | 0.15 | 0.21 | 1.47 | 0.24 | 0.08 |
| tts113                          | 0.95 | 0.11 | 0.15 | 1.07 | 0.12 | 0.17 |
| tts114                          | 1.23 | 0.18 | 0.09 | 1.22 | 0.15 | 0.14 |
| tts121                          | 0.5  | 0.12 | 0.25 | 0.54 | 0.12 | 0.26 |
| tts122                          | 0.83 | 0.23 | 0.18 | 0.65 | 0.19 | 0.23 |
| tts123                          | 0.45 | 0.14 | 0.24 | 0.52 | 0.14 | 0.26 |
| tts124                          | 0.31 | 0.07 | 0.17 | 0.48 | 0.07 | 0.19 |
| tts125                          | 1.12 | 0.18 | 0.15 | 1.16 | 0.21 | 0.16 |
| tts126                          | 0.71 | 0.16 | 0.22 | 0.69 | 0.16 | 0.28 |
| tts127                          | 0.54 | 0.21 | 0.18 | 0.91 | 0.22 | 0.24 |
| tts128                          | 1.1  | 0.15 | 0.17 | 1.21 | 0.18 | 0.17 |
| tts129                          | 0.32 | 0.06 | 0.12 | 0.55 | 0.14 | 0.21 |
| tts132                          | 0.39 | 0.12 | 0.15 | 0.44 | 0.05 | 0.23 |
| tts133                          | 0.55 | 0.05 | 0.21 | 0.66 | 0.12 | 0.29 |
| tts134                          | -    | -    | -    | 1.35 | 0.14 | 0.19 |
| tts135                          | 1.12 | 0.15 | 0.2  | 1.32 | 0.22 | 0.13 |

|                                  |      |      |      |      |      |      |
|----------------------------------|------|------|------|------|------|------|
| tts140                           | 1.25 | 0.17 | 0.22 | 1.2  | 0.16 | 0.21 |
| tts145                           | 0.41 | 0.06 | 0.22 | 0.38 | 0.11 | 0.2  |
| tts146                           | 1.38 | 0.14 | 0.11 | 1.48 | 0.19 | 0.1  |
| tts147                           | 0.98 | 0.23 | 0.19 | 1.15 | 0.2  | 0.16 |
| tts15                            | 0.34 | 0.08 | 0.23 | 0.5  | 0.09 | 0.23 |
| tts18                            | 0.97 | 0.3  | 0.16 | 1.14 | 0.28 | 0.16 |
| tts21                            | 0.91 | 0.15 | 0.2  | 1.2  | 0.17 | 0.17 |
| tts22                            | 0.45 | 0.12 | 0.17 | 0.4  | 0.11 | 0.24 |
| tts23                            | 0.43 | 0.07 | 0.1  | 0.56 | 0.1  | 0.17 |
| tts24                            | 0.73 | 0.24 | 0.23 | 0.7  | 0.2  | 0.28 |
| tts25                            | 0.56 | 0.11 | 0.17 | 0.51 | 0.07 | 0.28 |
| tts26                            | 1.05 | 0.13 | 0.15 | 1.05 | 0.07 | 0.17 |
| tts29                            | 0.93 | 0.33 | 0.2  | 1.16 | 0.19 | 0.25 |
| tts3                             | 0.41 | 0.03 | 0.19 | 0.6  | 0.11 | 0.2  |
| tts30                            | 0.39 | 0.04 | 0.2  | 0.64 | 0.17 | 0.26 |
| tts31                            | 1    | 0.06 | 0.17 | 1.06 | 0.06 | 0.11 |
| tts32                            | 0.74 | 0.19 | 0.21 | 1.03 | 0.23 | 0.16 |
| tts33                            | 0.85 | 0.15 | 0.2  | 1.01 | 0.22 | 0.15 |
| tts36                            | 1.1  | 0.22 | 0.09 | 1.06 | 0.27 | 0.09 |
| tts37                            | 0.28 | 0.12 | 0.21 | 0.5  | 0.06 | 0.21 |
| tts38                            | 0.7  | 0.27 | 0.18 | 0.77 | 0.15 | 0.21 |
| tts41                            | 0.33 | 0.05 | 0.22 | 0.47 | 0.07 | 0.11 |
| tts44                            | 1.21 | 0.2  | 0.11 | 1.1  | 0.18 | 0.24 |
| tts45                            | 0.95 | 0.13 | 0.17 | 1.14 | 0.15 | 0.13 |
| tts6                             | 0.94 | 0.32 | 0.19 | 0.95 | 0.28 | 0.18 |
| tts7                             | 0.37 | 0.07 | 0.16 | 0.52 | 0.07 | 0.2  |
| tts8                             | 0.64 | 0.16 | 0.15 | 0.68 | 0.16 | 0.23 |
| tts9                             | 1.15 | 0.24 | 0.06 | 1.08 | 0.17 | 0.22 |
| <b>Adults – Social Condition</b> |      |      |      |      |      |      |
| tts1                             | 0.32 | 0.05 | 0.12 | 0.5  | 0.09 | 0.17 |
| tts104                           | 0.33 | 0.06 | 0.12 | 0.43 | 0.02 | 0.16 |
| tts105                           | 0.95 | 0.11 | 0.14 | 1.06 | 0.13 | 0.14 |

|        |      |      |      |      |      |      |
|--------|------|------|------|------|------|------|
| tts108 | 0.71 | 0.36 | 0.1  | 0.75 | 0.24 | 0.21 |
| tts109 | 1.02 | 0.15 | 0.1  | 0.96 | 0.12 | 0.16 |
| tts11  | 0.62 | 0.24 | 0.32 | 0.89 | 0.22 | 0.29 |
| tts110 | 1.32 | 0.18 | 0.03 | 1.38 | 0.19 | 0.07 |
| tts111 | 1.14 | 0.12 | 0.15 | 1.17 | 0.19 | 0.11 |
| tts112 | 0.61 | 0.17 | 0.19 | 0.73 | 0.17 | 0.22 |
| tts115 | 1.11 | 0.14 | 0.19 | 1.29 | 0.2  | 0.12 |
| tts116 | 1.19 | 0.1  | 0.14 | 1.22 | 0.13 | 0.17 |
| tts117 | 0.65 | 0.23 | 0.2  | 0.77 | 0.22 | 0.2  |
| tts119 | 0.37 | 0.11 | 0.19 | 0.7  | 0.21 | 0.21 |
| tts12  | 0.33 | 0.05 | 0.13 | 0.47 | 0.07 | 0.1  |
| tts120 | 0.49 | 0.13 | 0.13 | 0.47 | 0.02 | 0.2  |
| tts13  | 0.8  | 0.27 | 0.17 | 0.91 | 0.24 | 0.19 |
| tts130 | 0.54 | 0.21 | 0.22 | 0.94 | 0.33 | 0.19 |
| tts131 | 0.2  | 0.11 | 0.28 | 0.47 | 0.07 | 0.24 |
| tts136 | 0.41 | 0.12 | 0.12 | 0.67 | 0.16 | 0.17 |
| tts137 | 1    | 0.16 | 0.22 | 1.19 | 0.22 | 0.12 |
| tts138 | 0.54 | 0.16 | 0.24 | 0.76 | 0.16 | 0.2  |
| tts139 | 0.25 | 0.09 | 0.22 | 0.59 | 0.19 | 0.24 |
| tts14  | 0.51 | 0.18 | 0.21 | 0.69 | 0.2  | 0.24 |
| tts141 | 0.57 | 0.21 | 0.25 | 0.81 | 0.22 | 0.21 |
| tts142 | 0.89 | 0.27 | 0.1  | 0.84 | 0.27 | 0.19 |
| tts143 | 0.44 | 0.17 | 0.26 | 0.5  | 0.1  | 0.29 |
| tts144 | 0.73 | 0.23 | 0.15 | 0.79 | 0.21 | 0.12 |
| tts150 | 0.34 | 0.06 | 0.1  | 0.56 | 0.11 | 0.14 |
| tts152 | 1    | 0.12 | 0.16 | 1.19 | 0.1  | 0.13 |
| tts153 | 0.71 | 0.29 | 0.21 | 0.77 | 0.27 | 0.23 |
| tts154 | 0.44 | 0.12 | 0.16 | 0.53 | 0.1  | 0.17 |
| tts155 | 0.55 | 0.22 | 0.25 | 0.59 | 0.25 | 0.29 |
| tts16  | 1.04 | 0.17 | 0.11 | 1.17 | 0.21 | 0.14 |
| tts17  | 0.45 | 0.13 | 0.21 | 0.66 | 0.17 | 0.2  |
| tts19  | 0.46 | 0.13 | 0.15 | 0.59 | 0.13 | 0.15 |

|       |      |      |      |      |      |      |
|-------|------|------|------|------|------|------|
| tts2  | 0.18 | 0.1  | 0.25 | 0.38 | 0.07 | 0.26 |
| tts20 | 0.43 | 0.08 | 0.14 | 0.44 | 0.05 | 0.27 |
| tts27 | 0.68 | 0.16 | 0.15 | 0.6  | 0.09 | 0.23 |
| tts28 | 0.33 | 0.07 | 0.09 | 0.42 | 0.03 | 0.13 |
| tts34 | 0.91 | 0.09 | 0.12 | 0.99 | 0.13 | 0.22 |
| tts35 | 0.48 | 0.13 | 0.19 | 0.51 | 0.05 | 0.26 |
| tts39 | 0.28 | 0.1  | 0.2  | 0.51 | 0.11 | 0.16 |
| tts4  | 0.44 | 0.13 | 0.11 | 0.58 | 0.15 | 0.26 |
| tts40 | 0.31 | 0.05 | 0.2  | 0.48 | 0.11 | 0.15 |
| tts42 | 1.14 | 0.13 | 0.17 | 1.24 | 0.19 | 0.11 |
| tts43 | 0.77 | 0.25 | 0.15 | 1.27 | 0.16 | 0.21 |
| tts46 | 0.37 | 0.14 | 0.25 | 0.98 | 0.3  | 0.18 |
| tts47 | 0.62 | 0.19 | 0.25 | 1.13 | 0.27 | 0.14 |
| tts5  | 1.18 | 0.22 | 0.07 | 1.26 | 0.3  | 0.06 |

**Figure S1: Individual estimated Ex-Gaussian distributions.** Individual RT distributions (correct trials, black curve) in children (A) and adults (B) for each trial type (Numerosity or Phonological comparison) and each condition (Social/Alone) and estimated distribution according to the Ex-Gaussian model estimated parameters (red curve).

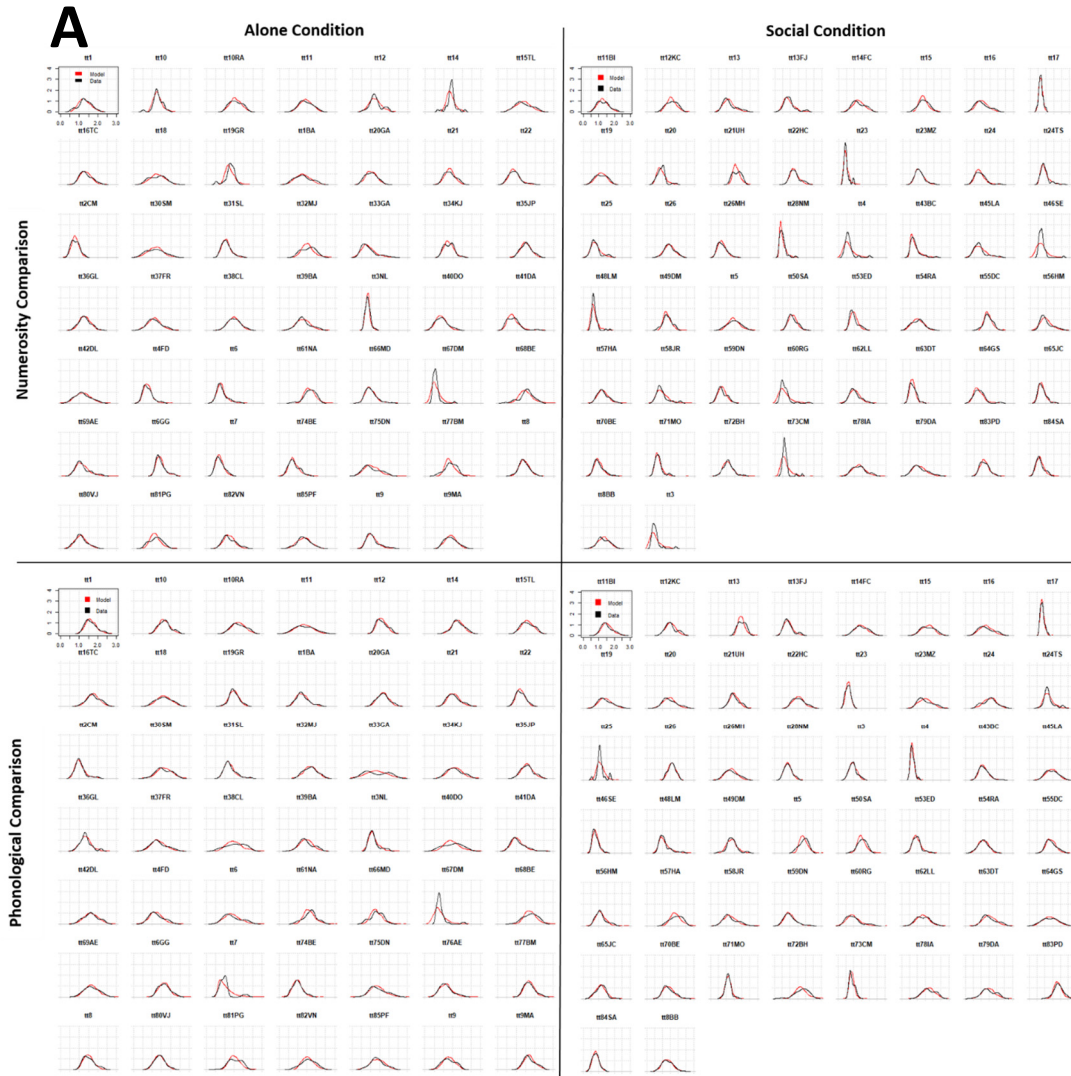

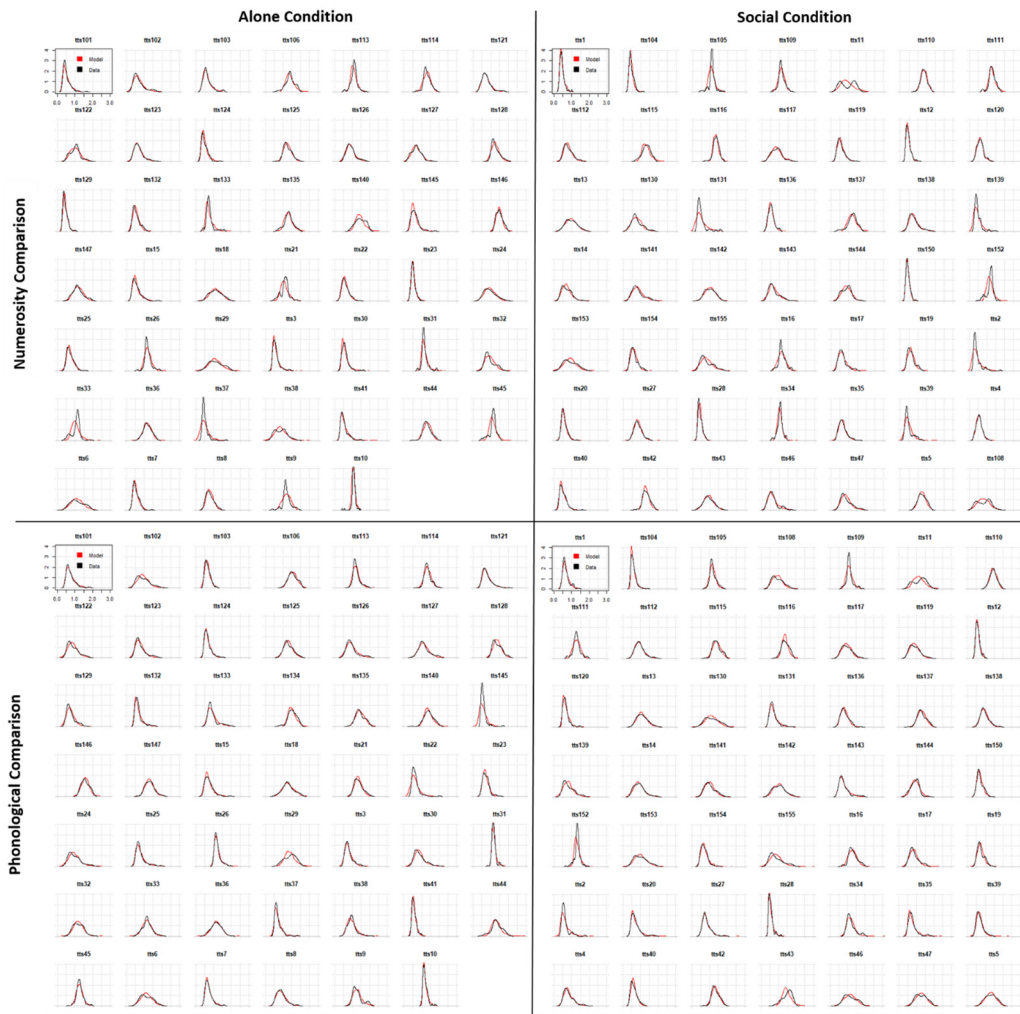

**B**

**Table S2: Individual estimated Diffusion model parameters.** Diffusion model estimated parameters (a, v, t0, szr, sv, st0) and fitting index for each subject (Children or Adults) and Trial type (Numerosity or Phonological comparison). A value of fitting index close to 1 indicates a good fitting.

|         | Numerosity Comparison      |        |        |        |        |        |               | Phonological Comparison |        |        |        |        |        |               |
|---------|----------------------------|--------|--------|--------|--------|--------|---------------|-------------------------|--------|--------|--------|--------|--------|---------------|
|         | a                          | v      | t0     | szr    | sv     | st0    | Fitting index | a                       | v      | t0     | szr    | sv     | st0    | Fitting index |
| Subject | Children – Alone Condition |        |        |        |        |        |               |                         |        |        |        |        |        |               |
| tt20GA  | 1.5002                     | 2.0866 | 0.6728 | 0.0002 | 0.0139 | 0.8530 | 0.9998        | 1.1539                  | 1.0431 | 1.4235 | 0.5372 | 0.7915 | 0.7778 | 1.0000        |
| tt22    | 2.3118                     | 3.0038 | 0.4790 | 0.1156 | 0.2975 | 0.6825 | 0.9987        | 1.6025                  | 1.7887 | 0.8578 | 0.5428 | 0.2312 | 0.5821 | 0.9861        |
| tt2CM   | 1.1449                     | 1.2806 | 0.5561 | 0.4506 | 0.5901 | 0.4554 | 0.9883        | 1.2795                  | 1.9456 | 0.7681 | 0.2557 | 0.8917 | 0.4367 | 0.9998        |
| tt31SL  | 1.6088                     | 2.5381 | 0.7418 | 0.1374 | 0.7722 | 0.5107 | 0.9857        | 1.2652                  | 0.7725 | 0.9361 | 0.3338 | 0.4376 | 0.3177 | 0.9999        |
| tt37FR  | 1.5644                     | 0.7864 | 0.3623 | 0.4199 | 0.5000 | 0.2025 | 0.9998        | 1.9362                  | 0.1953 | 0.5041 | 0.1274 | 0.1854 | 0.9959 | 0.7910        |
| tt3NL   | 1.6121                     | 1.2361 | 0.7022 | 0.4715 | 0.3264 | 0.5294 | 0.9997        | 1.5954                  | 0.6773 | 0.8531 | 0.2062 | 0.5853 | 0.4847 | 0.9979        |
| tt40DO  | 0.8719                     | 1.9244 | 0.6900 | 0.0005 | 0.3282 | 0.2175 | 0.9956        | 1.1973                  | 0.7116 | 0.8424 | 0.2905 | 0.4647 | 0.2560 | 0.9998        |
| tt41DA  | 1.6523                     | 1.2657 | 0.4057 | 0.1193 | 0.3271 | 0.6715 | 0.9892        | 1.5869                  | 0.8225 | 1.0161 | 0.5469 | 0.5229 | 1.3986 | 0.9910        |
| tt4FD   | 1.9134                     | 1.9935 | 0.3503 | 0.3125 | 0.3705 | 0.6989 | 0.9355        | 1.7891                  | 1.3874 | 0.5883 | 0.3046 | 0.5401 | 0.2372 | 0.9995        |
| tt6     | 1.6630                     | 0.9493 | 0.7426 | 0.1073 | 0.6322 | 0.5298 | 0.9824        | 1.5208                  | 0.8601 | 1.2543 | 0.4567 | 0.7820 | 0.8375 | 0.9923        |
| tt66MD  | 1.3233                     | 1.2845 | 0.4470 | 0.2404 | 0.6908 | 0.2074 | 0.9752        | 1.5525                  | 0.6604 | 0.7422 | 0.0599 | 0.6596 | 0.4725 | 0.9998        |
| tt67DM  | 1.2284                     | 0.9499 | 0.5290 | 0.0957 | 0.7030 | 0.2757 | 0.9968        | 1.7967                  | 0.8852 | 0.7978 | 0.3868 | 0.2386 | 0.3634 | 0.9996        |
| tt69AE  | 1.6823                     | 1.9144 | 0.6030 | 0.2403 | 0.4396 | 0.4408 | 0.9980        | 1.3150                  | 0.9831 | 1.0252 | 0.3113 | 0.0879 | 0.7366 | 0.8799        |
| tt74BE  | 0.7744                     | 1.6534 | 0.4174 | 0.2095 | 0.3642 | 0.2595 | 0.9998        | 1.0389                  | 2.0337 | 0.6222 | 0.1292 | 1.2734 | 0.2191 | 0.9999        |
| tt75DN  | 1.7294                     | 1.1464 | 0.6762 | 0.0779 | 0.6068 | 0.0580 | 0.9993        | 1.5231                  | 0.3530 | 1.1523 | 0.3636 | 0.4537 | 0.8655 | 0.9997        |
| tt80VJ  | 1.2643                     | 1.5067 | 0.4386 | 0.2597 | 0.5152 | 0.2209 | 0.9980        | 1.0916                  | 1.2996 | 0.6620 | 0.2888 | 0.5711 | 0.6108 | 0.9184        |
| tt82VN  |                            |        |        |        |        |        |               |                         |        |        |        |        |        |               |
| tt9     |                            |        |        |        |        |        |               |                         |        |        |        |        |        |               |

|        |       |       |       |       |       |       |       |       |       |       |       |       |       |       |
|--------|-------|-------|-------|-------|-------|-------|-------|-------|-------|-------|-------|-------|-------|-------|
| tt1    | 1.569 | 1.748 | 0.391 | 0.270 | 0.464 | 0.498 | 0.991 | 1.466 | 0.908 | 0.586 | 0.460 | 0.265 | 0.383 | 0.960 |
| tt10   | 6     | 1     | 7     | 3     | 7     | 6     | 5     | 7     | 1     | 6     | 7     | 4     | 3     | 2     |
| tt10R  | 1.619 | 0.165 | 0.408 | 0.360 | 0.238 | 0.466 | 0.999 | 1.746 | 0.809 | 0.852 | 0.522 | 0.449 | 0.055 | 0.998 |
| A      | 1     | 3     | 9     | 3     | 6     | 4     | 1     | 8     | 3     | 0     | 7     | 8     | 2     | 8     |
| tt11   | 1.652 | 1.358 | 0.688 | 0.212 | 0.478 | 0.389 | 0.998 | 1.437 | 2.112 | 1.130 | 0.028 | 0.905 | 0.635 | 0.999 |
|        | 1     | 1     | 0     | 6     | 2     | 4     | 9     | 4     | 8     | 2     | 7     | 3     | 3     | 9     |
| tt12   | 1.709 | 1.268 | 0.766 | 0.332 | 0.540 | 0.238 | 0.878 | 1.450 | 1.104 | 1.201 | 0.534 | 0.060 | 0.870 | 0.999 |
| tt14   | 7     | 7     | 4     | 5     | 1     | 5     | 8     | 6     | 5     | 8     | 1     | 2     | 5     | 6     |
| tt15TL | 1.534 | 1.170 | 0.653 | 0.117 | 0.698 | 0.292 | 1.000 | 1.453 | 0.329 | 0.793 | 0.114 | 0.263 | 0.759 | 0.995 |
|        | 0     | 3     | 4     | 0     | 3     | 5     | 0     | 1     | 4     | 8     | 2     | 7     | 2     | 8     |
| tt16TC | 1.618 | 1.379 | 0.926 | 0.108 | 0.396 | 0.342 | 0.977 | 1.605 | 1.324 | 1.220 | 0.509 | 0.314 | 0.242 | 1.000 |
| tt18   | 0     | 5     | 6     | 2     | 6     | 9     | 1     | 7     | 8     | 6     | 1     | 0     | 0     | 0     |
| tt19G  | 1.238 | 1.384 | 1.070 | 0.129 | 1.243 | 0.243 | 0.999 | 1.521 | 0.701 | 1.293 | 0.000 | 0.839 | 0.248 | 0.992 |
| R      | 6     | 5     | 9     | 5     | 2     | 2     | 9     | 2     | 8     | 2     | 1     | 3     | 5     | 3     |
| tt1BA  | 1.327 | 1.527 | 1.243 | 0.255 | 0.234 | 1.003 | 0.999 | 1.501 | 1.754 | 1.368 | 0.242 | 0.652 | 0.993 | 0.997 |
|        | 8     | 8     | 7     | 0     | 2     | 6     | 0     | 4     | 3     | 8     | 6     | 7     | 5     | 8     |
| tt21   | 1.606 | 0.794 | 0.927 | 0.089 | 0.572 | 0.485 | 0.996 | 1.935 | 0.634 | 0.747 | 0.322 | 0.511 | 0.739 | 0.985 |
| tt30S  | 0     | 0     | 3     | 3     | 5     | 9     | 8     | 9     | 3     | 7     | 8     | 2     | 3     | 8     |
| M      | 1.781 | 1.904 | 0.858 | 0.000 | 0.616 | 0.269 | 0.997 | 1.518 | 1.460 | 1.232 | 0.408 | 0.319 | 0.346 | 0.994 |
| tt32M  | 6     | 6     | 1     | 0     | 7     | 6     | 8     | 6     | 6     | 5     | 0     | 5     | 3     | 6     |
| J      | 1.518 | 2.523 | 1.119 | 0.049 | 0.565 | 0.368 | 0.753 | 1.547 | 0.707 | 1.415 | 0.000 | 0.812 | 0.172 | 0.993 |
| tt34KJ | 4     | 6     | 0     | 2     | 1     | 6     | 4     | 8     | 9     | 7     | 0     | 6     | 4     | 3     |
| tt35JP | 1.857 | 1.501 | 0.896 | 0.806 | 0.005 | 0.718 | 0.990 | 1.733 | 2.059 | 1.212 | 0.509 | 0.012 | 0.872 | 0.995 |
|        | 0     | 0     | 3     | 4     | 8     | 7     | 2     | 6     | 8     | 0     | 2     | 5     | 2     | 8     |
| tt36GL | 1.595 | 1.210 | 0.942 | 0.327 | 0.399 | 0.320 | 0.997 | 1.429 | 0.273 | 1.383 | 0.124 | 0.590 | 0.581 | 0.996 |
| tt38CL | 8     | 7     | 8     | 0     | 2     | 6     | 5     | 6     | 0     | 6     | 2     | 3     | 3     | 5     |
| tt39B  | 1.673 | 1.061 | 0.785 | 0.279 | 0.000 | 0.971 | 0.968 | 1.500 | 1.367 | 1.257 | 0.554 | 1.101 | 1.131 | 0.999 |
| A      | 4     | 9     | 1     | 9     | 0     | 6     | 8     | 0     | 6     | 2     | 1     | 4     | 1     | 7     |
| tt61N  | 1.160 | 1.950 | 1.101 | 0.065 | 0.564 | 0.292 | 0.923 | 1.350 | 1.467 | 1.197 | 0.464 | 0.376 | 0.411 | 1.000 |
| A      | 4     | 8     | 8     | 0     | 4     | 5     | 7     | 8     | 5     | 4     | 9     | 3     | 5     | 0     |
| tt68BE | 1.698 | 1.335 | 0.800 | 0.029 | 0.774 | 0.935 | 0.994 | 1.469 | 1.316 | 0.898 | 0.409 | 0.508 | 0.481 | 0.998 |
|        | 6     | 2     | 6     | 6     | 7     | 4     | 6     | 8     | 4     | 1     | 2     | 6     | 9     | 2     |
| tt6GG  | 1.402 | 0.738 | 0.998 | 0.528 | 0.405 | 0.385 | 0.997 | 1.723 | 1.656 | 1.117 | 0.110 | 0.302 | 0.580 | 0.999 |
| tt77B  | 7     | 2     | 6     | 8     | 6     | 7     | 6     | 5     | 9     | 5     | 7     | 0     | 5     | 8     |
| M      | 1.530 | 1.545 | 0.799 | 0.643 | 0.188 | 1.317 | 0.994 | 1.953 | 1.673 | 1.170 | 0.750 | 0.000 | 0.995 | 0.885 |
| tt8    | 4     | 3     | 1     | 3     | 4     | 4     | 4     | 6     | 2     | 5     | 1     | 0     | 7     | 9     |
| tt81P  | 1.256 | 1.125 | 1.238 | 0.439 | 0.018 | 1.088 | 0.999 | 1.270 | 1.403 | 1.410 | 0.272 | 0.336 | 0.833 | 1.000 |
| G      | 6     | 3     | 1     | 0     | 4     | 6     | 4     | 8     | 5     | 6     | 7     | 0     | 2     | 0     |
| tt85PF | 1.550 | 3.306 | 0.994 | 0.063 | 0.464 | 0.872 | 0.988 | 1.535 | 0.922 | 1.206 | 0.370 | 0.489 | 0.706 | 0.999 |
|        | 9     | 8     | 4     | 2     | 7     | 7     | 7     | 2     | 4     | 8     | 7     | 8     | 0     | 4     |
| tt9MA  | 1.439 | 1.267 | 1.184 | 0.000 | 0.492 | 0.492 | 0.884 | 1.384 | 1.282 | 1.266 | 0.586 | 0.008 | 0.719 | 0.979 |
| tt76AE | 1     | 6     | 6     | 1     | 1     | 4     | 5     | 0     | 5     | 2     | 6     | 5     | 6     | 4     |

|                             |            |            |            |            |            |            |            |            |            |            |            |            |            |            |
|-----------------------------|------------|------------|------------|------------|------------|------------|------------|------------|------------|------------|------------|------------|------------|------------|
|                             | 1.405<br>3 | 1.319<br>8 | 0.927<br>2 | 0.514<br>4 | 0.138<br>2 | 0.684<br>1 | 0.998<br>9 | 1.396<br>7 | 1.594<br>7 | 1.031<br>1 | 0.209<br>9 | 1.168<br>0 | 0.478<br>7 | 0.963<br>7 |
|                             | 1.173<br>0 | 0.303<br>6 | 1.187<br>4 | 0.006<br>4 | 0.310<br>2 | 0.919<br>6 | 0.999<br>7 | 1.620<br>0 | 0.422<br>1 | 1.096<br>9 | 0.000<br>0 | 0.598<br>8 | 0.835<br>6 | 0.903<br>9 |
|                             | 1.765<br>2 | 1.590<br>3 | 0.825<br>1 | 0.001<br>6 | 0.664<br>9 | 0.573<br>2 | 0.995<br>0 | 1.587<br>2 | 0.940<br>3 | 0.939<br>3 | 0.079<br>4 | 0.368<br>0 | 0.592<br>6 | 0.996<br>3 |
|                             | 1.344<br>2 | 2.116<br>5 | 1.387<br>1 | 0.144<br>1 | 0.000<br>0 | 0.771<br>1 | 0.994<br>7 | 1.309<br>4 | 0.859<br>1 | 1.418<br>7 | 0.734<br>4 | 0.511<br>3 | 0.610<br>6 | 0.985<br>3 |
|                             | 1.585<br>7 | 1.554<br>9 | 1.191<br>4 | 0.230<br>5 | 0.216<br>7 | 0.728<br>1 | 0.912<br>0 | 1.385<br>9 | 1.891<br>9 | 1.449<br>3 | 0.000<br>2 | 0.699<br>4 | 1.008<br>3 | 0.994<br>0 |
|                             | 1.581<br>4 | 1.888<br>7 | 1.096<br>7 | 0.287<br>5 | 0.621<br>0 | 0.052<br>5 | 0.999<br>8 | 1.457<br>4 | 1.718<br>0 | 1.325<br>2 | 0.470<br>0 | 0.662<br>5 | 0.791<br>8 | 0.999<br>5 |
|                             | 1.511<br>3 | 2.830<br>9 | 1.160<br>3 | 0.889<br>2 | 1.096<br>5 | 0.727<br>6 | 0.943<br>4 | 1.305<br>6 | 0.689<br>7 | 1.347<br>2 | 0.453<br>8 | 0.006<br>2 | 0.398<br>2 | 0.999<br>8 |
|                             | 1.493<br>9 | 0.962<br>9 | 1.065<br>8 | 0.054<br>8 | 1.343<br>9 | 0.385<br>4 | 0.999<br>4 | 1.650<br>2 | 0.832<br>2 | 1.121<br>5 | 0.000<br>0 | 1.160<br>1 | 0.000<br>3 | 0.995<br>9 |
|                             | 1.608<br>0 | 2.006<br>6 | 0.825<br>8 | 0.396<br>3 | 0.881<br>4 | 1.070<br>7 | 0.943<br>5 | 1.303<br>5 | 1.239<br>4 | 1.188<br>9 | 0.327<br>4 | 0.358<br>9 | 1.056<br>7 | 0.985<br>9 |
|                             | 1.767<br>2 | 1.413<br>5 | 0.866<br>7 | 0.125<br>5 | 0.396<br>2 | 0.458<br>3 | 0.997<br>2 | 1.664<br>5 | 1.139<br>1 | 0.940<br>0 | 0.330<br>1 | 0.688<br>6 | 0.589<br>1 | 0.996<br>8 |
|                             | 1.676<br>1 | 1.784<br>6 | 0.961<br>0 | 0.345<br>5 | 0.715<br>9 | 0.758<br>1 | 0.999<br>8 | 1.645<br>3 | 1.470<br>6 | 1.307<br>6 | 0.349<br>9 | 0.487<br>7 | 0.218<br>0 | 0.980<br>6 |
|                             | -          | -          | -          | -          | -          | -          | -          | 1.244<br>6 | 0.917<br>9 | 0.790<br>9 | 0.501<br>8 | 0.087<br>9 | 0.593<br>9 | 0.999<br>7 |
| Children – Social Condition |            |            |            |            |            |            |            |            |            |            |            |            |            |            |
| tt11BI                      | 1.555<br>1 | 0.550<br>8 | 0.855<br>5 | 0.412<br>9 | 0.213<br>5 | 0.318<br>6 | 0.891<br>1 | 1.630<br>7 | 1.173<br>2 | 1.070<br>0 | 0.041<br>5 | 0.639<br>9 | 0.348<br>2 | 0.994<br>5 |
| tt12KC                      | 1.779<br>4 | 2.590<br>8 | 1.219<br>3 | 0.421<br>8 | 0.000<br>0 | 1.141<br>9 | 0.989<br>1 | 1.547<br>4 | 0.930<br>5 | 1.122<br>9 | 0.255<br>8 | 0.540<br>1 | 0.228<br>0 | 0.994<br>9 |
| tt13                        | 2.113<br>2 | 1.600<br>3 | 0.601<br>8 | 0.026<br>0 | 0.816<br>5 | 0.000<br>1 | 0.984<br>8 | 1.236<br>1 | 2.203<br>7 | 1.749<br>0 | 0.596<br>6 | 0.087<br>8 | 0.783<br>0 | 0.999<br>7 |
| tt13FJ                      | 1.414<br>0 | 1.149<br>3 | 0.542<br>0 | 0.000<br>0 | 0.896<br>4 | 0.445<br>2 | 0.991<br>3 | 1.351<br>0 | 0.740<br>7 | 0.511<br>6 | 0.508<br>5 | 0.389<br>3 | 0.302<br>2 | 0.999<br>5 |
| tt14FC                      | 1.687<br>9 | 1.103<br>2 | 0.785<br>8 | 0.443<br>6 | 0.083<br>2 | 0.585<br>3 | 0.933<br>4 | 1.871<br>2 | 1.679<br>1 | 1.081<br>5 | 0.806<br>5 | 0.000<br>0 | 0.967<br>3 | 0.975<br>7 |
| tt15                        | 1.363<br>4 | 1.027<br>3 | 1.030<br>6 | 0.053<br>9 | 0.062<br>1 | 0.594<br>1 | 0.999<br>5 | 1.560<br>9 | 1.108<br>5 | 1.191<br>4 | 0.439<br>4 | 0.058<br>6 | 1.167<br>5 | 0.996<br>8 |
| tt16                        | 1.656<br>4 | 0.993<br>8 | 0.501<br>0 | 0.195<br>6 | 0.514<br>9 | 0.392<br>0 | 0.997<br>4 | 1.610<br>5 | 0.524<br>8 | 0.775<br>3 | 0.478<br>8 | 0.160<br>7 | 0.509<br>8 | 0.999<br>7 |
| tt17                        | 0.994<br>0 | 2.122<br>1 | 0.515<br>3 | 0.292<br>0 | 0.766<br>1 | 0.154<br>3 | 0.991<br>9 | 0.844<br>3 | 1.565<br>5 | 0.686<br>1 | 0.266<br>2 | 0.355<br>5 | 0.240<br>1 | 0.999<br>9 |
| tt19                        |            |            |            |            |            |            |            |            |            |            |            |            |            |            |
| tt20                        |            |            |            |            |            |            |            |            |            |            |            |            |            |            |
| tt21U                       |            |            |            |            |            |            |            |            |            |            |            |            |            |            |
| H                           |            |            |            |            |            |            |            |            |            |            |            |            |            |            |
| tt22H                       |            |            |            |            |            |            |            |            |            |            |            |            |            |            |
| C                           |            |            |            |            |            |            |            |            |            |            |            |            |            |            |

|            |            |            |            |            |            |            |            |            |            |            |            |            |            |            |
|------------|------------|------------|------------|------------|------------|------------|------------|------------|------------|------------|------------|------------|------------|------------|
| tt23       | 1.943<br>0 | 2.367<br>4 | 0.804<br>2 | 0.976<br>6 | 0.013<br>3 | 1.102<br>6 | 0.974<br>7 | 1.736<br>8 | 0.834<br>7 | 0.826<br>1 | 0.364<br>3 | 0.177<br>2 | 0.507<br>0 | 0.999<br>9 |
| tt23M<br>Z | 1.227<br>0 | 2.023<br>1 | 0.675<br>7 | 0.088<br>2 | 0.000<br>8 | 0.494<br>9 | 0.880<br>3 | 2.111<br>8 | 1.289<br>1 | 0.835<br>2 | 0.360<br>4 | 0.414<br>5 | 0.229<br>3 | 0.997<br>2 |
| tt24       | 1.142<br>0 | 1.562<br>4 | 1.381<br>2 | 0.000<br>0 | 0.365<br>2 | 0.856<br>5 | 0.982<br>6 | 1.575<br>9 | 1.538<br>7 | 1.148<br>2 | 0.664<br>2 | 0.250<br>5 | 0.264<br>9 | 0.999<br>3 |
| tt24TS     | 1.610<br>5 | 1.622<br>1 | 0.877<br>4 | 0.287<br>2 | 0.405<br>0 | 0.481<br>7 | 0.926<br>1 | 1.562<br>9 | 1.272<br>8 | 1.106<br>3 | 0.131<br>3 | 0.595<br>3 | 0.911<br>1 | 0.999<br>0 |
| tt26       | 1.119<br>7 | 0.867<br>9 | 0.289<br>9 | 0.079<br>0 | 2.181<br>4 | 0.031<br>2 | 0.985<br>8 | 0.679<br>6 | 0.701<br>5 | 0.547<br>3 | 0.093<br>1 | 0.481<br>5 | 0.375<br>6 | 0.999<br>8 |
| tt26M<br>H | 1.525<br>3 | 1.574<br>6 | 0.711<br>5 | 0.161<br>1 | 0.536<br>0 | 0.337<br>0 | 0.999<br>5 | 1.809<br>5 | 0.974<br>8 | 0.949<br>4 | 0.534<br>2 | 0.304<br>4 | 0.545<br>3 | 0.985<br>9 |
| tt28N<br>M | 1.417<br>2 | 1.441<br>2 | 0.510<br>2 | 0.272<br>1 | 0.298<br>2 | 0.610<br>3 | 0.999<br>8 | 1.955<br>1 | 0.010<br>0 | 0.863<br>4 | 0.407<br>8 | 0.213<br>5 | 0.464<br>1 | 0.982<br>7 |
| tt3        | 1.518<br>4 | 2.303<br>4 | 0.580<br>6 | 0.148<br>9 | 0.741<br>0 | 0.332<br>6 | 0.987<br>3 | 1.532<br>9 | 2.059<br>7 | 0.913<br>4 | 0.125<br>9 | 1.110<br>5 | 0.202<br>5 | 0.979<br>9 |
| tt43BC     | 1.595<br>3 | 1.930<br>3 | 0.427<br>1 | 0.468<br>8 | 0.690<br>6 | 0.286<br>4 | 0.982<br>6 | 1.034<br>6 | 0.716<br>6 | 0.846<br>2 | 0.218<br>3 | 0.483<br>8 | 0.365<br>6 | 0.957<br>1 |
| tt45LA     | 1.524<br>4 | 0.995<br>9 | 1.072<br>0 | 0.000<br>0 | 0.615<br>4 | 0.337<br>3 | 0.999<br>7 | 1.215<br>5 | 1.897<br>3 | 1.386<br>1 | 0.195<br>7 | 0.748<br>6 | 0.546<br>5 | 0.999<br>8 |
| tt46SE     | 1.414<br>7 | 1.092<br>0 | 0.342<br>0 | 0.354<br>0 | 0.451<br>6 | 0.333<br>6 | 0.995<br>6 | 1.512<br>2 | 0.885<br>2 | 0.935<br>1 | 0.580<br>4 | 0.706<br>0 | 0.866<br>1 | 0.999<br>9 |
| tt48L<br>M | 1.202<br>6 | 2.210<br>0 | 0.241<br>6 | 0.268<br>3 | 0.339<br>1 | 0.269<br>1 | 0.994<br>1 | 1.218<br>8 | 1.067<br>5 | 0.592<br>5 | 0.513<br>6 | 0.113<br>0 | 0.554<br>9 | 0.999<br>2 |
| tt49D<br>M | 1.223<br>6 | 1.859<br>0 | 0.264<br>8 | 0.226<br>9 | 1.142<br>9 | 0.049<br>8 | 0.993<br>1 | 1.294<br>9 | 0.997<br>3 | 0.619<br>1 | 0.457<br>3 | 0.540<br>1 | 0.459<br>8 | 0.996<br>5 |
| tt5        | 1.554<br>1 | 2.411<br>7 | 0.292<br>6 | 0.000<br>0 | 0.925<br>5 | 0.337<br>5 | 0.924<br>0 | 0.910<br>2 | 1.072<br>4 | 0.523<br>8 | 0.134<br>0 | 1.117<br>8 | 0.187<br>5 | 0.999<br>1 |
| tt50SA     | 1.346<br>5 | 1.102<br>8 | 0.424<br>5 | 0.252<br>4 | 0.606<br>4 | 0.194<br>6 | 0.990<br>1 | 1.460<br>3 | 1.280<br>7 | 0.775<br>9 | 0.441<br>0 | 0.372<br>0 | 0.532<br>6 | 0.999<br>9 |
| tt53E<br>D | 1.556<br>6 | 1.339<br>9 | 0.425<br>5 | 0.229<br>8 | 0.923<br>4 | 0.453<br>6 | 0.967<br>4 | 1.591<br>8 | 1.387<br>4 | 0.984<br>4 | 0.078<br>1 | 0.010<br>0 | 1.028<br>3 | 0.998<br>0 |
| tt54R<br>A | 1.026<br>7 | 1.077<br>2 | 0.525<br>1 | 0.034<br>6 | 1.486<br>2 | 0.230<br>7 | 0.991<br>0 | 1.272<br>5 | 1.809<br>0 | 0.524<br>6 | 0.227<br>7 | 0.634<br>8 | 0.217<br>8 | 0.994<br>6 |
| tt55D<br>C | 1.013<br>4 | 2.202<br>4 | 0.535<br>3 | 0.331<br>4 | 0.484<br>0 | 0.128<br>8 | 0.999<br>3 | 1.584<br>4 | 1.429<br>3 | 0.674<br>2 | 0.227<br>8 | 0.715<br>8 | 0.213<br>1 | 0.993<br>7 |
| tt56H<br>M | 1.413<br>3 | 1.590<br>0 | 0.985<br>7 | 0.465<br>1 | 0.451<br>3 | 0.575<br>5 | 0.985<br>0 | 1.495<br>0 | 1.483<br>6 | 1.002<br>4 | 0.081<br>2 | 0.472<br>7 | 0.385<br>7 | 0.989<br>8 |
| tt57H<br>A | 1.687<br>2 | 0.890<br>6 | 1.035<br>3 | 0.577<br>3 | 0.389<br>6 | 0.192<br>3 | 0.994<br>1 | 1.139<br>2 | 1.153<br>4 | 1.577<br>1 | 0.000<br>0 | 0.791<br>2 | 0.993<br>1 | 0.987<br>7 |
| tt58JR     | 1.598<br>3 | 1.633<br>0 | 0.747<br>5 | 0.275<br>5 | 0.196<br>2 | 0.378<br>2 | 0.997<br>1 | 1.504<br>6 | 3.767<br>4 | 1.389<br>1 | 0.870<br>4 | 2.057<br>2 | 0.727<br>6 | 0.998<br>8 |
| tt59D<br>N |            |            |            |            |            |            |            |            |            |            |            |            |            |            |
| tt60R<br>G |            |            |            |            |            |            |            |            |            |            |            |            |            |            |
| tt62LL     |            |            |            |            |            |            |            |            |            |            |            |            |            |            |

|                  |            |            |            |            |            |            |            |            |            |            |            |            |            |            |
|------------------|------------|------------|------------|------------|------------|------------|------------|------------|------------|------------|------------|------------|------------|------------|
| tt63D<br>T       | 1.344<br>7 | 0.960<br>4 | 0.627<br>8 | 0.473<br>7 | 0.387<br>3 | 0.056<br>0 | 1.000<br>0 | 1.562<br>7 | 2.053<br>4 | 0.606<br>1 | 0.097<br>5 | 0.556<br>2 | 0.459<br>8 | 0.949<br>4 |
| tt64G<br>S       | 1.405<br>0 | 2.074<br>6 | 0.751<br>8 | 0.992<br>4 | 0.942<br>0 | 0.972<br>2 | 0.986<br>2 | 1.609<br>9 | 1.308<br>3 | 0.663<br>8 | 0.217<br>1 | 0.263<br>9 | 0.840<br>2 | 0.950<br>2 |
| tt65JC<br>tt70BE | 1.251<br>5 | 1.038<br>5 | 1.104<br>1 | 0.406<br>0 | 0.057<br>5 | 0.324<br>3 | 0.999<br>3 | 1.590<br>7 | 1.324<br>5 | 0.973<br>3 | 0.168<br>2 | 0.361<br>1 | 0.352<br>5 | 0.998<br>4 |
| tt71M<br>O       | 1.787<br>3 | 1.198<br>1 | 0.481<br>3 | 0.000<br>0 | 0.864<br>6 | 0.000<br>7 | 0.997<br>7 | 1.489<br>5 | 1.377<br>4 | 0.703<br>0 | 0.195<br>4 | 0.439<br>6 | 0.578<br>0 | 0.999<br>0 |
| tt72B<br>H       | 1.457<br>0 | 0.885<br>1 | 0.873<br>3 | 0.348<br>1 | 0.411<br>5 | 0.491<br>7 | 0.998<br>9 | 1.533<br>0 | 1.489<br>1 | 1.423<br>2 | 0.333<br>8 | 0.631<br>7 | 1.058<br>3 | 0.960<br>0 |
| tt73C<br>M       | 1.500<br>5 | 0.681<br>7 | 0.540<br>4 | 0.204<br>0 | 1.193<br>1 | 0.345<br>9 | 0.996<br>1 | 1.766<br>5 | 0.863<br>1 | 0.700<br>9 | 0.427<br>7 | 0.472<br>6 | 0.275<br>6 | 0.997<br>9 |
| tt78IA           | 1.374<br>0 | -<br>0.192 | 0.316<br>0 | 0.000<br>8 | 0.210<br>3 | 0.455<br>7 | 0.997<br>1 | 1.415<br>6 | 0.306<br>6 | 0.560<br>8 | 0.564<br>2 | 0.508<br>9 | 0.543<br>2 | 0.999<br>7 |
| tt79D<br>A       | 1.333<br>3 | 1.191<br>5 | 0.339<br>4 | 0.420<br>7 | 1.737<br>4 | 0.020<br>3 | 0.955<br>9 | 1.908<br>3 | -<br>0.138 | 0.291<br>2 | 0.293<br>8 | 0.514<br>9 | 0.214<br>7 | 0.979<br>9 |
| tt83P<br>D       | 1.626<br>5 | 1.266<br>3 | 0.580<br>5 | 0.311<br>0 | 0.157<br>8 | 0.369<br>9 | 0.999<br>8 | 1.607<br>4 | 0.219<br>4 | 0.793<br>6 | 0.691<br>2 | 0.113<br>0 | 0.677<br>4 | 0.991<br>5 |
| tt84SA<br>tt8BB  | 1.239<br>0 | 1.915<br>2 | 0.380<br>2 | 0.267<br>0 | 0.449<br>3 | 0.393<br>7 | 0.997<br>2 | 1.699<br>5 | 0.847<br>1 | 0.923<br>8 | 0.401<br>9 | 0.019<br>5 | 0.420<br>3 | 0.998<br>0 |
|                  | 1.465<br>8 | 0.542<br>8 | 0.346<br>1 | 0.350<br>3 | 0.938<br>3 | 0.692<br>2 | 0.959<br>7 | 1.681<br>7 | 0.922<br>2 | 0.879<br>6 | 0.710<br>6 | 0.565<br>2 | 1.263<br>6 | 0.997<br>3 |
|                  | 1.185<br>7 | 0.970<br>7 | 0.454<br>4 | 0.066<br>3 | 0.733<br>4 | 0.358<br>0 | 0.999<br>8 | 1.079<br>2 | 0.889<br>2 | 0.906<br>7 | 0.897<br>0 | 0.338<br>9 | 0.772<br>2 | 0.982<br>9 |
|                  | 1.482<br>5 | 1.323<br>1 | 0.602<br>4 | 0.420<br>6 | 0.359<br>6 | 0.258<br>1 | 0.999<br>4 | 1.563<br>2 | 1.019<br>2 | 0.920<br>7 | 0.400<br>0 | 0.315<br>3 | 0.336<br>8 | 0.997<br>2 |
|                  | 1.227<br>8 | 2.125<br>3 | 0.474<br>7 | 0.066<br>9 | 0.866<br>6 | 0.374<br>1 | 0.999<br>4 | 0.941<br>0 | 1.486<br>8 | 0.943<br>4 | 0.058<br>3 | 0.577<br>4 | 0.418<br>0 | 0.999<br>4 |
|                  | 1.819<br>3 | 1.929<br>5 | 0.684<br>9 | 0.228<br>7 | 0.464<br>7 | 0.592<br>8 | 0.990<br>4 | 1.309<br>9 | 0.681<br>8 | 1.377<br>0 | 0.063<br>9 | 0.238<br>6 | 1.008<br>2 | 0.990<br>5 |
|                  | 0.790<br>0 | 1.058<br>3 | 0.504<br>7 | 0.271<br>4 | 0.442<br>0 | 0.217<br>5 | 0.999<br>6 | 1.108<br>9 | -<br>0.317 | 0.656<br>5 | 0.115<br>1 | 0.658<br>9 | 0.207<br>6 | 0.947<br>0 |
|                  | 1.776<br>4 | 2.108<br>9 | 0.901<br>9 | 0.437<br>4 | 0.378<br>6 | 1.002<br>7 | 0.988<br>0 | 1.542<br>2 | 0.936<br>1 | 1.258<br>2 | 0.274<br>9 | 0.263<br>7 | 0.677<br>8 | 0.975<br>3 |
|                  | 1.998<br>1 | 1.301<br>3 | 0.494<br>0 | 0.336<br>1 | 0.439<br>4 | 0.269<br>8 | 0.980<br>6 | 1.639<br>1 | 0.629<br>6 | 1.030<br>5 | 0.256<br>8 | 0.540<br>1 | 0.232<br>5 | 0.932<br>3 |
|                  | 1.467<br>0 | 1.667<br>3 | 0.822<br>7 | 0.522<br>5 | 0.507<br>3 | 0.532<br>6 | 0.993<br>3 | 1.257<br>2 | 0.942<br>3 | 1.579<br>9 | 0.673<br>3 | 0.182<br>3 | 0.597<br>3 | 0.999<br>9 |
|                  | 1.184<br>3 | 1.322<br>0 | 0.348<br>9 | 0.046<br>5 | 0.736<br>4 | 0.278<br>4 | 0.998<br>7 | 1.181<br>8 | 0.366<br>9 | 0.497<br>2 | 0.223<br>8 | 0.932<br>5 | 0.510<br>7 | 0.999<br>3 |
|                  | 1.704<br>2 | 1.049<br>4 | 0.803<br>2 | 0.504<br>9 | 0.263<br>7 | 0.499<br>9 | 0.920<br>8 | 1.599<br>5 | 0.989<br>9 | 0.889<br>1 | 0.465<br>3 | 0.389<br>3 | 0.476<br>4 | 0.973<br>3 |

| Adults – Alone Condition |       |       |       |       |       |       |       |       |       |       |       |       |       |       |
|--------------------------|-------|-------|-------|-------|-------|-------|-------|-------|-------|-------|-------|-------|-------|-------|
| tts10                    | 0.760 | 2.717 | 0.996 | 0.000 | 1.581 | 0.034 | 0.720 | 1.269 | 3.251 | 1.014 | 0.422 | 0.247 | 0.083 | 0.999 |
| tts101                   | 6     | 1     | 5     | 0     | 8     | 0     | 4     | 4     | 3     | 0     | 1     | 9     | 4     | 7     |
| tts102                   | 1.952 | 3.393 | 0.207 | 0.050 | 1.024 | 0.004 | 0.905 | 2.033 | 2.684 | 0.356 | 0.047 | 0.825 | 0.002 | 0.994 |
| tts103                   | 3     | 5     | 6     | 3     | 2     | 6     | 5     | 1     | 1     | 4     | 5     | 4     | 6     | 0     |
| tts106                   | 1.499 | 0.955 | 0.291 | 0.378 | 1.162 | 0.018 | 0.999 | 1.904 | 1.464 | 0.434 | 0.500 | 0.241 | 0.416 | 0.878 |
| tts113                   | 9     | 6     | 2     | 1     | 2     | 2     | 8     | 6     | 2     | 1     | 6     | 8     | 1     | 1     |
| tts114                   | 1.517 | 2.316 | 0.316 | 0.140 | 0.509 | 0.268 | 0.978 | 1.545 | 3.124 | 0.431 | 0.711 | 0.000 | 0.052 | 0.999 |
| tts121                   | 5     | 5     | 2     | 6     | 5     | 2     | 8     | 9     | 2     | 0     | 1     | 0     | 5     | 8     |
| tts122                   | 1.528 | 2.442 | 1.144 | 0.466 | 0.364 | 0.468 | 0.801 | 2.038 | 2.773 | 1.199 | 0.024 | 0.000 | 0.499 | 0.951 |
| tts123                   | 1     | 9     | 9     | 3     | 2     | 9     | 9     | 3     | 4     | 7     | 2     | 0     | 1     | 8     |
| tts124                   | 0.877 | 2.785 | 1.000 | 0.083 | 0.416 | 0.323 | 0.731 | 1.193 | 2.109 | 1.006 | 0.254 | 0.888 | 0.120 | 0.997 |
| tts125                   | 4     | 9     | 0     | 9     | 6     | 6     | 5     | 1     | 4     | 4     | 6     | 5     | 3     | 7     |
| tts126                   | 1.296 | 2.021 | 1.058 | 0.198 | 0.489 | 0.250 | 0.984 | 1.402 | 2.329 | 1.088 | 0.078 | 0.614 | 0.214 | 0.999 |
| tts127                   | 1     | 3     | 7     | 9     | 8     | 5     | 5     | 2     | 9     | 3     | 0     | 5     | 0     | 8     |
| tts128                   | 1.493 | 2.108 | 0.412 | 0.329 | 0.191 | 0.399 | 0.997 | 1.750 | 2.067 | 0.397 | 0.240 | 0.640 | 0.116 | 0.999 |
| tts129                   | 3     | 0     | 9     | 6     | 6     | 3     | 8     | 1     | 3     | 1     | 7     | 5     | 0     | 8     |
| tts132                   | 1.207 | 1.718 | 0.765 | 0.023 | 1.017 | 0.693 | 0.662 | 1.952 | 1.920 | 0.443 | 0.498 | 0.326 | 0.112 | 0.908 |
| tts133                   | 3     | 1     | 3     | 8     | 4     | 5     | 7     | 5     | 2     | 9     | 2     | 5     | 5     | 7     |
| tts135                   | 1.323 | 1.533 | 0.360 | 0.228 | 0.640 | 0.375 | 1.000 | 1.685 | 2.056 | 0.386 | 0.277 | 0.514 | 0.187 | 0.983 |
| tts140                   | 5     | 1     | 9     | 3     | 5     | 7     | 0     | 6     | 5     | 1     | 7     | 9     | 5     | 4     |
| tts145                   | 1.140 | 1.381 | 0.236 | 0.198 | 0.745 | 0.034 | 0.993 | 1.183 | 2.030 | 0.413 | 0.056 | 0.715 | 0.224 | 0.999 |
| tts146                   | 8     | 2     | 5     | 3     | 3     | 0     | 1     | 5     | 7     | 5     | 7     | 9     | 4     | 2     |
| tts147                   | 1.193 | 0.707 | 0.987 | 0.220 | 0.500 | 0.262 | 0.993 | 1.769 | 1.923 | 0.927 | 0.303 | 0.048 | 0.311 | 0.976 |
| tts15                    | 9     | 9     | 3     | 6     | 7     | 9     | 9     | 5     | 1     | 1     | 9     | 7     | 8     | 0     |
| tts18                    | 1.497 | 2.075 | 0.609 | 0.468 | 0.200 | 0.411 | 0.999 | 2.449 | 2.943 | 0.514 | 0.097 | 1.043 | 0.343 | 0.999 |
| tts21                    | 0     | 0     | 6     | 2     | 8     | 7     | 1     | 9     | 5     | 8     | 4     | 7     | 3     | 8     |
| tts22                    | 1.368 | 1.783 | 0.414 | 0.055 | 0.791 | 0.641 | 0.753 | 1.549 | 1.510 | 0.766 | 0.240 | 0.612 | 0.385 | 0.997 |
| tts23                    | 6     | 2     | 6     | 2     | 2     | 5     | 9     | 2     | 7     | 2     | 7     | 5     | 9     | 4     |
| tts24                    | 1.666 | 2.302 | 0.942 | 0.292 | 0.816 | 0.004 | 0.971 | 1.742 | 2.011 | 1.001 | 0.574 | 0.093 | 0.247 | 0.906 |
| tts25                    | 0     | 8     | 5     | 9     | 7     | 2     | 1     | 6     | 2     | 1     | 7     | 5     | 5     | 8     |
| tts26                    | 1.140 | 2.680 | 0.266 | 0.573 | 0.586 | 0.037 | 0.902 | 1.479 | 1.752 | 0.421 | 0.086 | 0.737 | 0.021 | 0.998 |
| tts15                    | 8     | 6     | 2     | 4     | 0     | 5     | 9     | 6     | 8     | 8     | 6     | 6     | 6     | 5     |
| tts18                    | 1.285 | 1.738 | 0.250 | 0.246 | 0.603 | 0.087 | 0.999 | 1.544 | 2.869 | 0.377 | 0.000 | 1.080 | 0.191 | 0.995 |
| tts21                    | 1     | 5     | 7     | 7     | 9     | 2     | 3     | 9     | 4     | 0     | 4     | 6     | 8     | 9     |
| tts22                    | 1.097 | 2.062 | 0.553 | 0.027 | 0.640 | 0.088 | 0.890 | 1.877 | 2.409 | 0.536 | 0.000 | 0.872 | 0.031 | 0.964 |
| tts23                    | 2     | 3     | 3     | 4     | 5     | 9     | 2     | 7     | 0     | 7     | 0     | 0     | 9     | 5     |
| tts24                    | 1.290 | 1.849 | 1.087 | 0.140 | 0.793 | 0.425 | 0.962 | 1.504 | 2.044 | 1.172 | 0.710 | 0.007 | 0.351 | 0.972 |
| tts25                    | 7     | 7     | 1     | 7     | 3     | 2     | 6     | 7     | 8     | 5     | 0     | 0     | 9     | 8     |
| tts26                    | 1.935 | 3.546 | 1.170 | 0.000 | 0.435 | 0.886 | 0.886 | 1.427 | 2.303 | 1.158 | 0.557 | 0.456 | 0.550 | 0.999 |
| tts26                    | 1     | 1     | 8     | 7     | 7     | 5     | 5     | 4     | 2     | 5     | 6     | 9     | 9     | 2     |

|        |            |            |            |            |            |            |            |            |            |            |            |            |            |            |
|--------|------------|------------|------------|------------|------------|------------|------------|------------|------------|------------|------------|------------|------------|------------|
| tts29  | 1.149<br>5 | 1.640<br>9 | 0.370<br>2 | 0.259<br>0 | 0.615<br>4 | 0.327<br>5 | 0.995<br>5 | 1.338<br>0 | 3.455<br>7 | 0.370<br>2 | 0.013<br>9 | 0.433<br>2 | 0.123<br>3 | 0.998<br>9 |
| tts3   |            |            |            |            |            |            |            |            |            |            |            |            |            |            |
| tts30  | 1.393<br>5 | 2.429<br>9 | 1.235<br>2 | 0.242<br>3 | 0.331<br>6 | 0.382<br>5 | 0.899<br>3 | 1.500<br>7 | 2.403<br>6 | 1.306<br>7 | 0.189<br>4 | 0.004<br>4 | 0.492<br>2 | 0.895<br>9 |
| tts31  | 1.460<br>6 | 1.601<br>3 | 0.852<br>6 | 0.313<br>8 | 0.877<br>4 | 0.429<br>1 | 0.977<br>1 | 1.644<br>6 | 2.930<br>3 | 1.021<br>7 | 0.143<br>0 | 0.615<br>3 | 0.653<br>3 | 0.999<br>6 |
| tts32  |            |            |            |            |            |            |            |            |            |            |            |            |            |            |
| tts33  | 1.368<br>0 | 1.323<br>7 | 0.249<br>1 | 0.066<br>9 | 0.812<br>4 | 0.002<br>8 | 0.920<br>6 | 1.205<br>7 | 0.917<br>3 | 0.418<br>6 | 0.285<br>4 | 0.537<br>7 | 0.328<br>4 | 0.999<br>8 |
| tts36  | 1.975<br>1 | 2.116<br>1 | 0.664<br>6 | 0.059<br>8 | 0.216<br>7 | 0.882<br>7 | 0.959<br>2 | 1.405<br>8 | 0.819<br>4 | 0.975<br>7 | 0.215<br>7 | 0.816<br>4 | 0.469<br>0 | 0.984<br>6 |
| tts37  |            |            |            |            |            |            |            |            |            |            |            |            |            |            |
| tts38  | 1.813<br>2 | 3.335<br>0 | 0.845<br>3 | 0.145<br>2 | 1.512<br>4 | 0.517<br>6 | 0.113<br>3 | 1.551<br>9 | 2.032<br>3 | 1.036<br>2 | 0.318<br>4 | 0.414<br>4 | 0.404<br>9 | 0.995<br>1 |
| tts41  | 1.242<br>4 | 1.661<br>9 | 0.350<br>6 | 0.357<br>3 | 0.430<br>6 | 0.221<br>8 | 0.999<br>8 | 1.512<br>7 | 2.718<br>8 | 0.362<br>1 | 0.231<br>4 | 0.238<br>7 | 0.208<br>4 | 0.996<br>5 |
| tts44  |            |            |            |            |            |            |            |            |            |            |            |            |            |            |
| tts45  | 0.964<br>4 | 2.337<br>7 | 0.379<br>9 | 0.067<br>6 | 1.193<br>1 | 0.155<br>3 | 1.000<br>0 | 1.427<br>6 | 2.784<br>2 | 0.464<br>2 | 0.000<br>0 | 0.000<br>0 | 0.397<br>5 | 0.912<br>4 |
| tts6   | 1.571<br>4 | 1.351<br>0 | 0.544<br>0 | 0.294<br>1 | 0.501<br>5 | 0.504<br>3 | 0.999<br>2 | 1.727<br>6 | 1.396<br>3 | 0.515<br>0 | 0.426<br>0 | 0.340<br>9 | 0.257<br>3 | 0.909<br>3 |
| tts7   |            |            |            |            |            |            |            |            |            |            |            |            |            |            |
| tts8   | 1.105<br>7 | 0.964<br>9 | 0.477<br>9 | 0.195<br>1 | 0.708<br>0 | 0.220<br>3 | 0.999<br>1 | 1.509<br>2 | 2.139<br>8 | 0.447<br>6 | 0.029<br>9 | 0.891<br>7 | 0.125<br>0 | 0.992<br>9 |
| tts9   | 1.251<br>9 | 2.569<br>5 | 0.983<br>5 | 0.126<br>6 | 0.843<br>6 | 0.088<br>0 | 0.985<br>4 | 1.542<br>6 | 3.260<br>5 | 0.962<br>7 | 0.014<br>4 | 1.046<br>9 | 0.127<br>5 | 0.999<br>7 |
| tts134 | 1.702<br>5 | 1.778<br>1 | 0.703<br>3 | 0.624<br>3 | 0.137<br>5 | 1.009<br>0 | 0.980<br>2 | 1.105<br>3 | 1.220<br>6 | 1.207<br>8 | 0.484<br>1 | 0.841<br>8 | 0.941<br>1 | 0.996<br>6 |
|        | 1.102<br>6 | 1.873<br>1 | 0.389<br>4 | 0.000<br>0 | 0.850<br>1 | 0.145<br>9 | 0.976<br>7 | 1.524<br>5 | 2.467<br>5 | 0.513<br>1 | 0.217<br>7 | 1.042<br>4 | 0.182<br>9 | 0.999<br>4 |
|        | 1.062<br>0 | 2.202<br>0 | 0.400<br>0 | 0.275<br>4 | 0.386<br>1 | 0.240<br>1 | 0.996<br>8 | 1.566<br>4 | 1.308<br>7 | 0.480<br>9 | 0.499<br>5 | 0.414<br>5 | 0.067<br>9 | 0.999<br>3 |
|        | 1.032<br>6 | 2.052<br>7 | 0.999<br>9 | 0.073<br>1 | 1.086<br>8 | 0.037<br>5 | 0.688<br>6 | 1.356<br>6 | 4.348<br>1 | 1.009<br>1 | 0.098<br>3 | 0.841<br>5 | 0.158<br>2 | 0.999<br>1 |
|        | 1.612<br>8 | 1.619<br>7 | 0.561<br>9 | 0.380<br>3 | 0.695<br>9 | 0.131<br>4 | 0.938<br>6 | 1.468<br>4 | 2.118<br>2 | 0.887<br>2 | 0.096<br>3 | 0.087<br>9 | 0.758<br>9 | 0.943<br>3 |
|        | 0.966<br>3 | 1.951<br>6 | 0.948<br>2 | 0.331<br>6 | 0.508<br>6 | 0.353<br>8 | 0.131<br>5 | 1.543<br>1 | 2.077<br>0 | 0.891<br>0 | 0.556<br>1 | 0.597<br>6 | 0.407<br>4 | 0.860<br>9 |
|        | 1.197<br>3 | 1.344<br>5 | 0.942<br>8 | 0.246<br>2 | 0.947<br>2 | 0.416<br>5 | 0.985<br>6 | 1.340<br>5 | 1.831<br>4 | 0.888<br>1 | 0.297<br>1 | 0.002<br>5 | 0.651<br>0 | 0.998<br>4 |
|        | 0.979<br>0 | 2.319<br>6 | 0.326<br>9 | 0.085<br>3 | 1.519<br>7 | 0.023<br>6 | 0.966<br>8 | 1.274<br>8 | 2.479<br>5 | 0.466<br>7 | 0.357<br>2 | 0.666<br>9 | 0.074<br>4 | 0.969<br>5 |
|        | 1.603<br>7 | 1.112<br>3 | 0.557<br>5 | 0.917<br>8 | 0.090<br>6 | 0.498<br>7 | 0.550<br>4 | 1.346<br>0 | 2.212<br>9 | 0.722<br>6 | 0.119<br>8 | 1.084<br>1 | 0.407<br>3 | 0.974<br>2 |
|        | 1.740<br>5 | 2.845<br>8 | 0.226<br>0 | 0.113<br>8 | 0.890<br>7 | 0.068<br>6 | 0.998<br>5 | 1.163<br>5 | 3.007<br>8 | 0.393<br>2 | 0.352<br>0 | 0.324<br>2 | 0.148<br>4 | 0.998<br>4 |

|                           |            |            |            |            |            |            |            |            |            |            |            |            |            |            |
|---------------------------|------------|------------|------------|------------|------------|------------|------------|------------|------------|------------|------------|------------|------------|------------|
|                           | 1.218<br>3 | 1.534<br>2 | 1.043<br>3 | 0.125<br>1 | 0.732<br>5 | 0.401<br>7 | 0.998<br>7 | 1.329<br>8 | 1.137<br>5 | 1.053<br>0 | 0.000<br>0 | 0.715<br>9 | 0.380<br>9 | 0.930<br>2 |
|                           | 0.966<br>4 | 2.032<br>3 | 0.996<br>8 | 0.221<br>4 | 0.762<br>5 | 0.330<br>3 | 0.445<br>4 | 1.260<br>4 | 2.769<br>7 | 1.066<br>3 | 0.206<br>3 | 0.847<br>0 | 0.292<br>5 | 0.999<br>8 |
|                           | 1.786<br>2 | 1.743<br>0 | 0.675<br>7 | 0.444<br>7 | 0.028<br>5 | 0.963<br>8 | 0.850<br>8 | 1.510<br>2 | 0.029<br>2 | 0.817<br>0 | 0.000<br>0 | 2.499<br>3 | 0.904<br>2 | 0.952<br>6 |
|                           | 1.185<br>9 | 1.873<br>6 | 0.296<br>6 | 0.246<br>8 | 0.638<br>1 | 0.157<br>5 | 0.976<br>3 | 1.253<br>4 | 1.637<br>7 | 0.457<br>5 | 0.065<br>8 | 0.837<br>7 | 0.120<br>8 | 0.997<br>5 |
|                           | 1.331<br>5 | 2.032<br>6 | 0.511<br>5 | 0.097<br>9 | 0.377<br>1 | 0.418<br>3 | 0.996<br>8 | 1.947<br>4 | 2.813<br>8 | 0.561<br>9 | 0.504<br>7 | 0.016<br>0 | 0.509<br>9 | 0.994<br>7 |
|                           | 1.087<br>6 | 1.820<br>8 | 1.007<br>6 | 0.272<br>7 | 0.136<br>1 | 0.142<br>5 | 0.956<br>7 | 1.712<br>5 | 1.948<br>6 | 0.910<br>5 | 0.316<br>1 | 0.498<br>0 | 0.210<br>2 | 0.955<br>5 |
|                           | -          | -          | -          | -          | -          | -          | -          | 1.902<br>1 | 3.004<br>6 | 1.250<br>3 | 0.597<br>5 | 0.000<br>0 | 0.430<br>7 | 0.979<br>6 |
| Adults – Social Condition |            |            |            |            |            |            |            |            |            |            |            |            |            |            |
| tts1                      | 1.267<br>1 | 3.436<br>9 | 0.259<br>5 | 0.230<br>4 | 0.464<br>7 | 0.161<br>9 | 0.997<br>5 | 1.200<br>8 | 2.104<br>2 | 0.417<br>4 | 0.252<br>7 | 0.484<br>4 | 0.167<br>4 | 0.982<br>4 |
| tts104                    | 0.930<br>6 | 1.942<br>5 | 0.280<br>9 | 0.244<br>2 | 0.554<br>8 | 0.112<br>5 | 0.919<br>5 | 1.200<br>5 | 2.479<br>0 | 0.377<br>1 | 0.411<br>5 | 0.675<br>7 | 0.043<br>8 | 0.980<br>9 |
| tts108                    | 1.296<br>2 | 2.920<br>7 | 0.939<br>3 | 0.054<br>9 | 1.680<br>2 | 0.000<br>1 | 0.326<br>1 | 1.294<br>3 | 2.229<br>2 | 0.954<br>5 | 0.282<br>1 | 0.763<br>3 | 0.067<br>5 | 0.993<br>7 |
| tts109                    | 1.693<br>7 | 1.508<br>6 | 0.455<br>6 | 0.652<br>3 | 0.403<br>6 | 0.911<br>3 | 0.234<br>5 | 2.012<br>9 | 1.927<br>4 | 0.511<br>3 | 0.669<br>7 | 0.022<br>0 | 0.370<br>5 | 0.887<br>3 |
| tts110                    | 1.094<br>4 | 1.983<br>8 | 0.933<br>4 | 0.288<br>1 | 0.669<br>8 | 0.172<br>5 | 0.996<br>2 | 1.126<br>8 | 2.794<br>1 | 0.947<br>2 | 0.452<br>7 | 0.690<br>7 | 0.171<br>1 | 0.938<br>4 |
| tts111                    | 2.038<br>7 | 1.535<br>3 | 0.521<br>3 | 0.901<br>7 | 0.172<br>2 | 0.869<br>2 | 0.025<br>5 | 1.961<br>9 | 2.386<br>4 | 0.804<br>1 | 0.000<br>0 | 0.103<br>1 | 1.105<br>4 | 0.423<br>4 |
| tts115                    | 1.151<br>4 | 2.455<br>2 | 1.155<br>7 | 0.452<br>1 | 0.545<br>1 | 0.359<br>7 | 0.998<br>9 | 1.303<br>5 | 2.250<br>9 | 1.212<br>2 | 0.062<br>0 | 0.309<br>1 | 0.406<br>9 | 0.982<br>4 |
| tts116                    | 1.042<br>6 | 1.739<br>3 | 1.106<br>5 | 0.086<br>0 | 0.439<br>6 | 0.290<br>6 | 0.998<br>7 | 1.091<br>3 | 1.955<br>2 | 1.090<br>8 | 0.277<br>1 | 0.504<br>7 | 0.258<br>3 | 0.981<br>4 |
| tts119                    | 1.432<br>0 | 1.324<br>7 | 0.470<br>3 | 0.073<br>5 | 1.133<br>7 | 0.221<br>7 | 0.981<br>6 | 1.420<br>0 | 1.962<br>1 | 0.643<br>2 | 0.338<br>2 | 0.163<br>1 | 0.446<br>7 | 0.985<br>7 |
| tts12                     | 1.114<br>6 | 1.951<br>2 | 1.105<br>9 | 0.080<br>7 | 0.162<br>8 | 0.553<br>2 | 0.979<br>2 | 1.254<br>0 | 1.765<br>9 | 1.125<br>2 | 0.427<br>5 | 0.066<br>1 | 0.483<br>0 | 0.994<br>3 |
| tts13                     | 1.090<br>4 | 3.047<br>8 | 1.184<br>9 | 0.015<br>6 | 0.540<br>1 | 0.348<br>6 | 0.992<br>1 | 1.189<br>2 | 1.912<br>6 | 1.144<br>4 | 0.000<br>0 | 0.187<br>1 | 0.491<br>9 | 0.950<br>3 |
| tts130                    | 1.409<br>9 | 1.735<br>6 | 0.543<br>5 | 0.728<br>4 | 0.000<br>0 | 0.704<br>5 | 0.955<br>2 | 1.892<br>3 | 2.217<br>8 | 0.566<br>3 | 0.605<br>6 | 0.000<br>1 | 0.633<br>4 | 0.987<br>6 |
| tts131                    | 1.214<br>9 | 1.406<br>5 | 0.288<br>4 | 0.212<br>5 | 0.665<br>6 | 0.212<br>2 | 1.000<br>0 | 1.631<br>3 | 1.761<br>0 | 0.526<br>6 | 0.445<br>9 | 0.163<br>3 | 0.495<br>1 | 0.982<br>5 |
| tts136                    |            |            |            |            |            |            |            |            |            |            |            |            |            |            |
| tts137                    |            |            |            |            |            |            |            |            |            |            |            |            |            |            |
| tts138                    |            |            |            |            |            |            |            |            |            |            |            |            |            |            |

|        |            |            |            |            |            |            |            |            |            |            |            |            |            |            |
|--------|------------|------------|------------|------------|------------|------------|------------|------------|------------|------------|------------|------------|------------|------------|
| tts139 | 1.106<br>4 | 2.882<br>9 | 0.273<br>9 | 0.278<br>7 | 0.570<br>5 | 0.142<br>5 | 0.635<br>7 | 0.978<br>0 | 2.672<br>8 | 0.409<br>0 | 0.341<br>8 | 0.436<br>0 | 0.202<br>5 | 0.999<br>1 |
| tts14  | 0.889<br>3 | 1.581<br>7 | 0.457<br>1 | 0.052<br>0 | 0.288<br>9 | 0.410<br>5 | 0.999<br>7 | 1.122<br>6 | 2.007<br>1 | 0.452<br>2 | 0.127<br>0 | 1.134<br>3 | 0.187<br>5 | 0.998<br>8 |
| tts141 | 1.692<br>3 | 2.140<br>4 | 0.650<br>2 | 0.371<br>4 | 1.659<br>1 | 0.732<br>5 | 0.969<br>3 | 1.842<br>9 | 2.131<br>8 | 0.685<br>1 | 0.000<br>0 | 0.209<br>3 | 0.654<br>2 | 0.999<br>9 |
| tts142 | 1.509<br>1 | 1.461<br>3 | 0.389<br>0 | 0.164<br>5 | 0.697<br>7 | 0.304<br>1 | 0.996<br>9 | 1.537<br>6 | 1.130<br>0 | 0.687<br>1 | 0.469<br>9 | 0.288<br>9 | 0.836<br>0 | 0.945<br>0 |
| tts143 | 1.417<br>8 | 2.732<br>6 | 0.199<br>8 | 0.000<br>2 | 1.161<br>6 | 0.157<br>5 | 0.996<br>3 | 1.481<br>8 | 2.322<br>4 | 0.398<br>6 | 0.000<br>0 | 0.608<br>9 | 0.237<br>4 | 0.998<br>7 |
| tts144 | 1.020<br>5 | 1.674<br>5 | 0.341<br>9 | 0.328<br>7 | 0.389<br>3 | 0.287<br>3 | 0.998<br>1 | 1.336<br>3 | 1.806<br>6 | 0.532<br>1 | 0.114<br>9 | 0.565<br>2 | 0.458<br>3 | 0.995<br>4 |
| tts150 | 1.306<br>2 | 2.342<br>0 | 1.008<br>3 | 0.298<br>0 | 0.301<br>4 | 0.547<br>8 | 0.941<br>0 | 1.867<br>7 | 2.545<br>3 | 0.982<br>8 | 0.724<br>6 | 0.063<br>0 | 0.352<br>5 | 0.969<br>5 |
| tts152 | 1.496<br>5 | 1.610<br>6 | 0.409<br>1 | 0.216<br>0 | 0.590<br>3 | 0.296<br>9 | 0.999<br>9 | 1.449<br>9 | 1.964<br>1 | 0.645<br>7 | 0.088<br>0 | 0.555<br>9 | 0.325<br>3 | 0.999<br>4 |
| tts153 | 1.307<br>7 | 2.967<br>9 | 0.235<br>1 | 0.081<br>3 | 1.334<br>5 | 0.097<br>5 | 0.988<br>8 | 1.694<br>4 | 1.535<br>6 | 0.395<br>7 | 0.506<br>4 | 0.285<br>9 | 0.052<br>5 | 0.893<br>3 |
| tts154 | 1.502<br>0 | 1.433<br>1 | 0.342<br>7 | 0.381<br>1 | 0.398<br>9 | 0.407<br>3 | 0.848<br>4 | 2.491<br>0 | 3.555<br>1 | 0.541<br>6 | 0.671<br>6 | 0.113<br>0 | 0.632<br>5 | 0.959<br>4 |
| tts155 | 1.545<br>8 | 1.328<br>1 | 0.401<br>9 | 0.288<br>0 | 0.489<br>8 | 0.309<br>6 | 0.997<br>7 | 1.739<br>7 | 1.801<br>6 | 0.596<br>6 | 0.354<br>3 | 0.138<br>3 | 0.518<br>7 | 0.998<br>1 |
| tts16  | 1.239<br>3 | 0.899<br>6 | 0.651<br>4 | 0.016<br>4 | 0.395<br>3 | 0.792<br>5 | 0.981<br>5 | 1.489<br>9 | 1.907<br>9 | 0.701<br>8 | 0.608<br>0 | 0.065<br>9 | 0.882<br>6 | 0.999<br>2 |
| tts17  | 1.910<br>5 | 1.902<br>1 | 0.242<br>5 | 0.079<br>9 | 0.745<br>4 | 0.052<br>6 | 0.978<br>2 | 1.753<br>2 | 2.220<br>6 | 0.391<br>3 | 0.075<br>6 | 0.708<br>8 | 0.140<br>3 | 0.998<br>8 |
| tts19  | 1.199<br>6 | 2.027<br>7 | 0.674<br>9 | 0.387<br>6 | 0.992<br>2 | 0.699<br>2 | 0.824<br>3 | 1.653<br>7 | 3.096<br>2 | 0.634<br>5 | 0.177<br>5 | 0.034<br>6 | 0.638<br>6 | 0.727<br>0 |
| tts2   | 0.995<br>1 | 2.704<br>1 | 0.283<br>1 | 0.219<br>2 | 0.607<br>3 | 0.112<br>5 | 0.998<br>6 | 1.134<br>7 | 1.310<br>0 | 0.450<br>5 | 0.331<br>6 | 0.489<br>8 | 0.149<br>5 | 0.991<br>5 |
| tts20  | 0.790<br>6 | 2.992<br>3 | 1.111<br>2 | 0.438<br>2 | 0.540<br>1 | 0.372<br>1 | 0.297<br>5 | 0.927<br>3 | 2.640<br>8 | 1.205<br>1 | 0.097<br>6 | 0.549<br>1 | 0.217<br>5 | 0.675<br>3 |
| tts27  | 2.015<br>5 | 1.829<br>1 | 0.443<br>5 | 0.728<br>7 | 0.087<br>9 | 0.713<br>6 | 0.950<br>7 | 1.902<br>8 | 1.557<br>3 | 0.547<br>0 | 0.721<br>4 | 0.063<br>5 | 0.457<br>0 | 0.910<br>2 |
| tts28  | 1.303<br>0 | 1.750<br>6 | 0.331<br>4 | 0.000<br>0 | 1.242<br>3 | 0.222<br>3 | 0.989<br>0 | 1.424<br>0 | 2.466<br>0 | 0.429<br>5 | 0.279<br>8 | 0.031<br>0 | 0.341<br>9 | 0.974<br>0 |
| tts34  | 1.963<br>2 | 1.460<br>0 | 0.235<br>6 | 0.295<br>5 | 0.337<br>2 | 0.100<br>1 | 0.858<br>7 | 2.020<br>7 | 1.472<br>9 | 0.271<br>7 | 0.105<br>4 | 0.389<br>3 | 0.214<br>4 | 0.938<br>6 |
| tts35  | 1.165<br>2 | 1.606<br>7 | 0.929<br>9 | 0.249<br>4 | 0.942<br>0 | 0.139<br>6 | 0.889<br>2 | 1.618<br>8 | 2.066<br>3 | 0.974<br>2 | 0.404<br>3 | 0.095<br>7 | 0.097<br>5 | 0.997<br>1 |
| tts39  | 1.317<br>7 | 1.804<br>7 | 0.358<br>8 | 0.152<br>6 | 0.741<br>0 | 0.314<br>0 | 0.999<br>1 | 1.653<br>8 | 1.994<br>6 | 0.497<br>7 | 0.393<br>9 | 0.087<br>9 | 0.264<br>8 | 0.999<br>7 |

|  |            |            |            |            |            |            |            |            |            |            |            |            |            |            |
|--|------------|------------|------------|------------|------------|------------|------------|------------|------------|------------|------------|------------|------------|------------|
|  | 1.310<br>2 | 1.789<br>2 | 0.347<br>2 | 0.363<br>9 | 0.557<br>8 | 0.143<br>2 | 0.986<br>5 | 1.364<br>1 | 1.938<br>3 | 0.461<br>2 | 0.334<br>9 | 0.370<br>7 | 0.116<br>2 | 0.965<br>7 |
|  | 1.309<br>5 | 2.531<br>8 | 0.169<br>3 | 0.002<br>5 | 0.846<br>1 | 0.002<br>3 | 0.911<br>0 | 1.490<br>0 | 2.855<br>0 | 0.363<br>5 | 0.055<br>3 | 1.836<br>2 | 0.119<br>2 | 0.983<br>0 |
|  | 1.276<br>6 | 2.517<br>4 | 0.343<br>0 | 0.337<br>0 | 0.565<br>2 | 0.126<br>1 | 0.999<br>1 | 1.702<br>6 | 2.342<br>5 | 0.346<br>0 | 0.332<br>6 | 0.497<br>3 | 0.115<br>3 | 0.999<br>7 |
|  | 1.080<br>3 | 1.064<br>1 | 0.573<br>8 | 0.216<br>9 | 0.138<br>2 | 0.425<br>9 | 0.996<br>9 | 1.375<br>3 | 1.983<br>4 | 0.529<br>1 | 0.216<br>1 | 0.741<br>0 | 0.213<br>0 | 0.993<br>3 |
|  | 1.098<br>5 | 2.441<br>8 | 0.244<br>3 | 0.305<br>3 | 0.896<br>9 | 0.038<br>0 | 0.958<br>1 | 1.048<br>9 | 2.679<br>2 | 0.383<br>8 | 0.387<br>3 | 0.439<br>6 | 0.110<br>9 | 0.991<br>8 |
|  | 0.945<br>3 | 2.305<br>1 | 0.906<br>1 | 0.451<br>0 | 0.364<br>2 | 0.230<br>1 | 0.846<br>8 | 1.192<br>6 | 0.905<br>6 | 0.907<br>4 | 0.008<br>0 | 0.772<br>5 | 0.270<br>5 | 0.998<br>2 |
|  | 1.405<br>8 | 2.176<br>5 | 0.366<br>5 | 0.137<br>3 | 0.577<br>5 | 0.370<br>6 | 1.000<br>0 | 1.441<br>9 | 1.656<br>6 | 0.463<br>8 | 0.000<br>1 | 1.743<br>9 | 0.187<br>3 | 0.988<br>6 |
|  | 1.463<br>5 | 2.623<br>2 | 0.180<br>6 | 0.133<br>6 | 0.860<br>0 | 0.050<br>6 | 0.646<br>8 | 1.376<br>2 | 2.087<br>2 | 0.396<br>9 | 0.270<br>1 | 0.564<br>8 | 0.197<br>3 | 0.996<br>9 |
|  | 1.063<br>2 | 2.439<br>5 | 0.383<br>1 | 0.363<br>1 | 0.533<br>0 | 0.327<br>8 | 0.988<br>0 | 1.444<br>9 | 1.244<br>9 | 0.449<br>4 | 0.165<br>0 | 0.540<br>1 | 0.157<br>0 | 0.999<br>3 |
|  | 1.157<br>4 | 1.443<br>6 | 0.259<br>1 | 0.391<br>3 | 0.410<br>8 | 0.143<br>4 | 0.978<br>3 | 1.441<br>8 | 2.142<br>2 | 0.329<br>2 | 0.341<br>2 | 0.559<br>6 | 0.000<br>1 | 0.972<br>5 |
|  | 1.200<br>1 | 1.689<br>7 | 1.063<br>6 | 0.450<br>0 | 0.288<br>6 | 0.350<br>4 | 0.968<br>5 | 1.258<br>6 | 1.619<br>7 | 1.060<br>2 | 0.208<br>7 | 0.504<br>3 | 0.358<br>1 | 0.989<br>1 |
|  | 1.304<br>5 | 1.080<br>3 | 0.606<br>6 | 0.415<br>0 | 0.270<br>3 | 0.518<br>7 | 0.999<br>7 | 0.824<br>7 | 0.607<br>1 | 1.387<br>9 | 0.000<br>0 | 0.715<br>8 | 0.680<br>9 | 0.952<br>0 |
|  | 1.280<br>3 | 0.987<br>5 | 0.289<br>4 | 0.238<br>4 | 0.741<br>0 | 0.302<br>1 | 0.961<br>0 | 1.568<br>3 | 1.566<br>5 | 0.737<br>8 | 0.437<br>7 | 0.580<br>6 | 0.863<br>2 | 0.861<br>7 |
|  | 1.584<br>7 | 1.306<br>0 | 0.462<br>3 | 0.458<br>8 | 0.621<br>9 | 0.009<br>0 | 0.988<br>2 | 1.297<br>5 | 0.729<br>2 | 0.931<br>9 | 0.113<br>8 | 0.186<br>0 | 0.708<br>9 | 0.891<br>2 |
|  | 1.261<br>6 | 2.212<br>3 | 1.008<br>6 | 0.487<br>0 | 0.153<br>9 | 0.581<br>5 | 0.991<br>0 | 1.565<br>1 | 2.347<br>1 | 1.000<br>9 | 0.668<br>6 | 0.123<br>8 | 0.860<br>8 | 0.993<br>7 |

**Figure S2: Individual estimated Diffusion model distributions.** Individual RT distributions (correct trials, black curve) in children (A) and adults (B) for each trial type (Numerosity or Phonological comparison) and each condition (Social/Alone) and estimated distribution according to the Diffusion model estimated parameters (red curve).

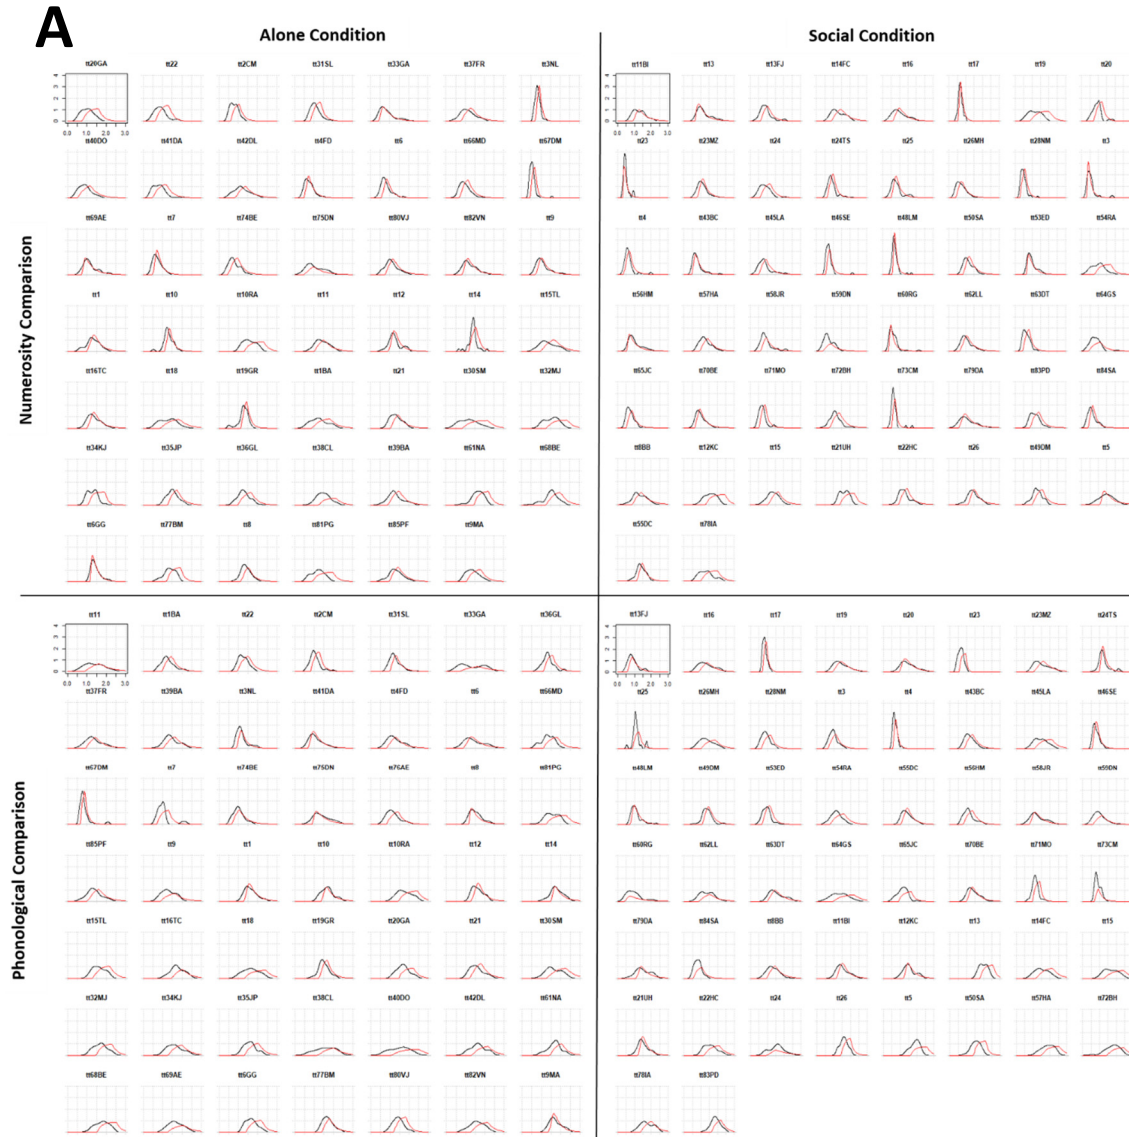

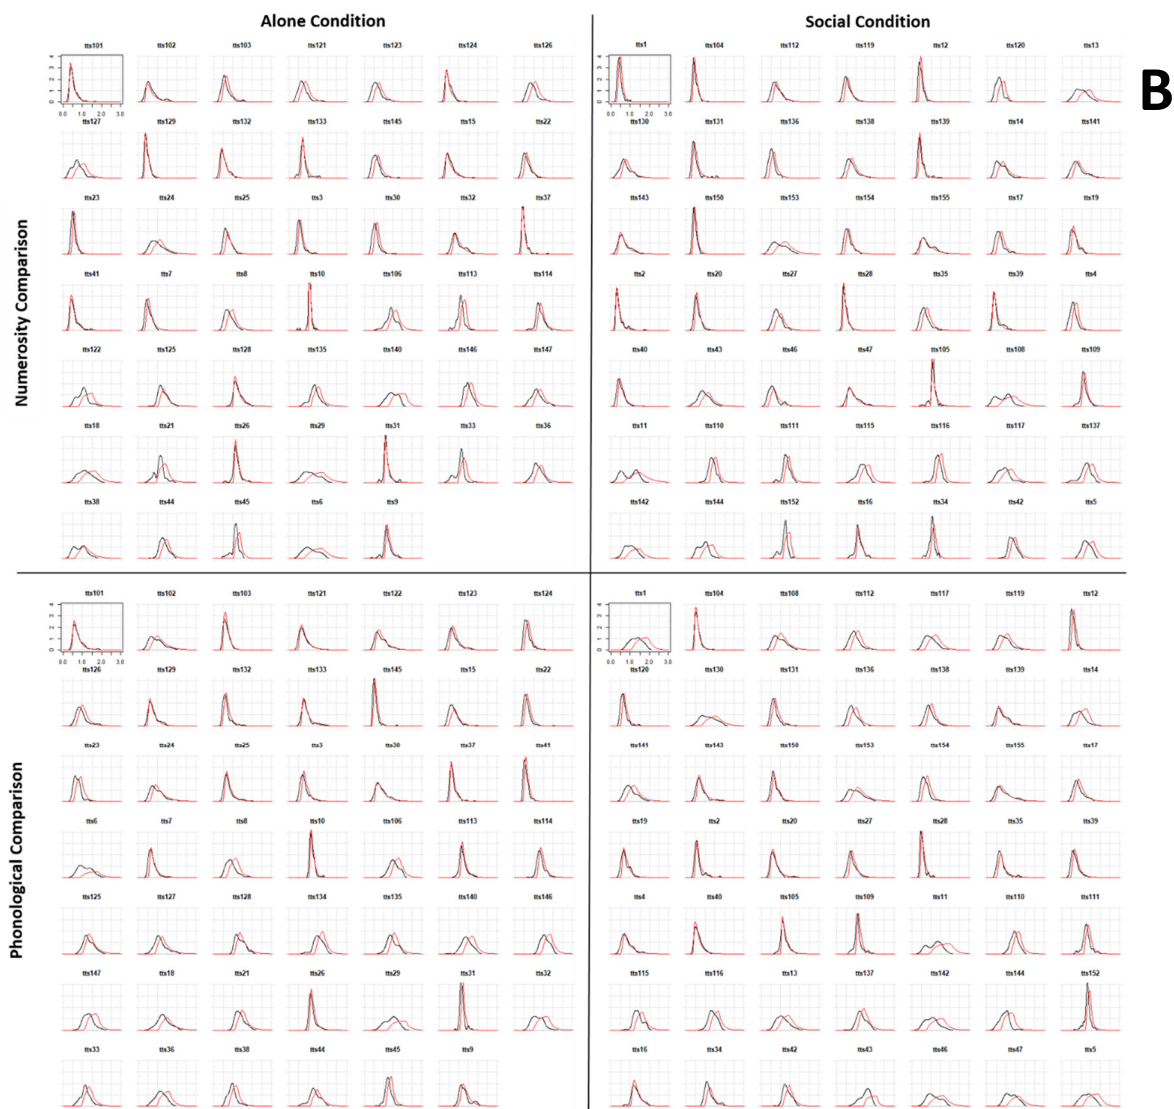

Supplement: s1 [file s1]
